# Supplementary material for: Effect of Digital Medication Event Reminder and Monitor-Observed Therapy vs Standard Directly Observed Therapy on Health-Related Quality of Life and Catastrophic Costs in Patients With Tuberculosis: A Secondary Analysis of a Randomized Clinical Trial
Source: PubMed Central journal article supplement (PMC9478770; doi:10.1001/jamanetworkopen.2022.30509), 2022-09-15
Supplement: jamanetwopen-e2230509-s001.pdf [file jamanetwopen-e2230509-s001.pdf]

1 **Electronic pillbox-enabled self-administered therapy versus standard directly observed**  
2 **therapy for tuberculosis medication adherence and treatment outcomes in Ethiopia: a**  
3 **multicenter randomized controlled trial (SELFTB trial)**

4

5 Principal Investigator: Dr. Tsegahun Manyazewal. [tsegahunm@gmail.com](mailto:tsegahunm@gmail.com),  
6 [tsegahun.manyazewal@aau.edu.et](mailto:tsegahun.manyazewal@aau.edu.et)  
7 Addis Ababa University, College of Health Sciences, Center for  
8 Innovative Drug Development and Therapeutic Trials for Africa (CDT-  
9 Africa). Tel: (+251)1118787311, Fax: (+251) 115511079, P.O.Box 9086  
10 Addis Ababa, Ethiopia

11 Co-investigators: Prof. Vincent C. Marconi. [vcmarco@emory.edu](mailto:vcmarco@emory.edu)  
12 Emory University School of Medicine and Rollins School of Public  
13 Health, Atlanta, GA, 30322, USA.

14  
15 Dr. Yimtubezinash Woldeamanuel  
16 [yimtubezinash.wamanuel@aau.edu.et](mailto:yimtubezinash.wamanuel@aau.edu.et)  
17 Addis Ababa University, College of Health Sciences. Tel:  
18 (+251)1118787311, Fax: (+251) 115511079, P.O.Box 9086 Addis  
19 Ababa, Ethiopia

20  
21 Dr. David P Holland. [david.holland@emory.edu](mailto:david.holland@emory.edu)  
22 Emory University School of Medicine and Rollins School of Public  
23 Health, Atlanta, GA, 30322, USA.

24  
25 Prof. Abebaw Fekadu. [abebaw.fekadu@aau.edu.et](mailto:abebaw.fekadu@aau.edu.et)  
26 Addis Ababa University, College of Health Sciences, Center for  
27 Innovative Drug Development and Therapeutic Trials for Africa (CDT-  
28 Africa). Tel: (+251)1118787311, Fax: (+251) 115511079, P.O.Box 9086  
29 Addis Ababa, Ethiopia.

30  
31 Prof. Henry M. Blumberg: [hblumbe@emory.edu](mailto:hblumbe@emory.edu)  
32 Emory University School of Medicine and Rollins School of Public  
33 Health, Atlanta, GA, 30322, USA.

34  
35 Collaborating Institutions: Addis Ababa University, Addis Ababa, Ethiopia  
36 Emory University School of Medicine, Atlanta, Georgia, 30322, USA  
37 Armauer Hansen Research Institute, Ethiopia  
38 Fogarty International Center of the National Institute of Health, USA  
39  
40

41

42

|    |                                                                     |           |
|----|---------------------------------------------------------------------|-----------|
| 43 | <b>CONTENTS</b>                                                     |           |
| 44 | <b>1. PROTOCOL SUMMARY</b> .....                                    | <b>1</b>  |
| 45 | 1.1. Synopsis.....                                                  | 1         |
| 46 | 1.2. Scheme.....                                                    | 4         |
| 47 | <b>2. BACKGROUND</b> .....                                          | <b>5</b>  |
| 48 | 2.1. Study rationale.....                                           | 5         |
| 49 | 2.2. TB Digital Adherence Technologies: evidence in literature..... | 9         |
| 50 | <b>3. CONCEPTUAL FRAMEWORK</b> .....                                | <b>11</b> |
| 51 | <b>4. HYPOTHESIS</b> .....                                          | <b>12</b> |
| 52 | <b>5. OBJECTIVES</b> .....                                          | <b>13</b> |
| 53 | 5.1. Primary objectives.....                                        | 13        |
| 54 | 5.1.1. Treatment adherence.....                                     | 13        |
| 55 | 5.1.2. Treatment outcomes.....                                      | 13        |
| 56 | 5.2. Secondary objectives.....                                      | 13        |
| 57 | 5.2.1. HRQoL and catastrophic cost.....                             | 13        |
| 58 | 5.2.2. Usability and treatment satisfaction.....                    | 13        |
| 59 | <b>6. OUTCOME MEASURES</b> .....                                    | <b>13</b> |
| 60 | 6.1. Primary outcome.....                                           | 13        |
| 61 | 6.1.1. Level of adherence.....                                      | 13        |
| 62 | 6.1.2. Sputum conversion.....                                       | 14        |
| 63 | 6.2. Secondary outcomes.....                                        | 14        |
| 64 | 6.2.1. Negative IsoScreen urine isoniazid test.....                 | 14        |
| 65 | 6.2.2. Adverse treatment outcome.....                               | 14        |

|    |           |                                                                     |           |
|----|-----------|---------------------------------------------------------------------|-----------|
| 66 | 6.2.3.    | Self-reported adherence .....                                       | 14        |
| 67 | 6.2.4.    | Health-related quality of life (HRQoL) .....                        | 14        |
| 68 | 6.2.5.    | Catastrophic costs .....                                            | 14        |
| 69 | 6.2.6.    | Post-diagnostic cost from an individual patient's perspective ..... | 14        |
| 70 | 6.2.7.    | Patient-reported treatment satisfaction .....                       | 14        |
| 71 | 6.2.8.    | Patient-reported usability of the MERM device.....                  | 15        |
| 72 | <b>7.</b> | <b>SIGNIFICANCE AND TRANSFORMING POTENTIAL.....</b>                 | <b>15</b> |
| 73 | <b>8.</b> | <b>METHODS.....</b>                                                 | <b>16</b> |
| 74 | 8.1.      | Materials .....                                                     | 16        |
| 75 | 8.2.      | Trial design .....                                                  | 18        |
| 76 | 8.3.      | Setting.....                                                        | 18        |
| 77 | 8.4.      | Site selection .....                                                | 19        |
| 78 | 8.5.      | Study participants .....                                            | 20        |
| 79 | 8.5.1.    | Study participants (TB patients).....                               | 20        |
| 80 | 8.5.1.1.  | Study population .....                                              | 20        |
| 81 | 8.5.1.2.  | Inclusion criteria .....                                            | 20        |
| 82 | 8.5.1.3.  | Exclusion criteria .....                                            | 20        |
| 83 | 8.5.1.4.  | Justification for inclusion and exclusion .....                     | 21        |
| 84 | 8.5.1.5.  | Sampling and sample size .....                                      | 21        |
| 85 | 8.5.2.    | Provider participants .....                                         | 21        |
| 86 | 8.5.2.1.  | Study population .....                                              | 21        |
| 87 | 8.5.2.2.  | Inclusion criteria .....                                            | 22        |
| 88 | 8.5.2.3.  | Exclusion criteria .....                                            | 22        |
| 89 | 8.5.2.4.  | Justification for inclusion and exclusion .....                     | 22        |
| 90 | 8.5.2.5.  | Sampling and sample size .....                                      | 22        |
| 91 | 8.6.      | Interventions .....                                                 | 22        |
| 92 | 8.7.      | Study procedure .....                                               | 23        |
| 93 | 8.8.      | Definition of terms.....                                            | 26        |
| 94 | 8.8.1.    | Medication adherence .....                                          | 26        |
| 95 | 8.8.2.    | Effectiveness .....                                                 | 26        |
| 96 | 8.8.3.    | Cost-effectiveness .....                                            | 26        |

|     |                                                       |           |
|-----|-------------------------------------------------------|-----------|
| 97  | 8.8.4. Usability .....                                | 26        |
| 98  | 8.8.5. TB patient .....                               | 27        |
| 99  | 8.8.6. TB patient cost.....                           | 27        |
| 100 | 8.8.7. New cases .....                                | 27        |
| 101 | 8.8.8. Bacteriologically confirmed TB case.....       | 27        |
| 102 | 8.8.9. Loss to follow-up.....                         | 27        |
| 103 | 8.8.10. Treatment completed .....                     | 27        |
| 104 | 8.8.11. Healthcare facility.....                      | 27        |
| 105 | 8.9. Data management .....                            | 27        |
| 106 | <b>9. STATISTICAL ANALYSIS.....</b>                   | <b>28</b> |
| 107 | <b>10. QUALITY ASSURANCE .....</b>                    | <b>29</b> |
| 108 | <b>11. STUDY ASSESSMENT AND DISCONTINUATION .....</b> | <b>29</b> |
| 109 | 11.1. Participant discontinuation.....                | 29        |
| 110 | 11.2. Unexpected or adverse events .....              | 30        |
| 111 | 11.3. Interim monitoring and analysis .....           | 30        |
| 112 | <b>12. ETHICAL CONSIDERATIONS .....</b>               | <b>31</b> |
| 113 | 12.1. Statement of compliance .....                   | 31        |
| 114 | 12.2. Ethical review.....                             | 31        |
| 115 | 12.3. Informed consent .....                          | 32        |
| 116 | 12.4. Confidentiality .....                           | 32        |
| 117 | 12.5. Payment for participation .....                 | 32        |
| 118 | <b>13. REFERENCES .....</b>                           | <b>33</b> |
| 119 |                                                       |           |

120  
121  
122  
123  
124  
125  
126  
127  
128  
129  
130  
131  
132  
133  
134  
135  
136  
137

138 **1. PROTOCOL SUMMARY**

139 **1.1. Synopsis**

Title: Electronic pillbox-enabled self-administered therapy versus standard directly observed therapy for tuberculosis medication adherence and treatment outcomes in Ethiopia: a multicenter randomized controlled trial (SELFTB trial)

Hypothesis: The use of a digital medication event reminder and monitor device-observed self-administered therapy provides non-inferior medication adherence and treatment outcomes for patients with TB compared with the standard in-person directly-observed therapy (DOT) in Ethiopia, one of the low-income countries with the highest burden of TB.

Objectives: Primary objectives:

1. To assess whether a digital medication event reminder monitor (MERM) device-observed self-administered therapy improves adherence in patients with TB compared with the standard DOT.
2. To assess whether MERM-observed self-administered therapy improves treatment outcomes in patients with TB compared with the standard DOT.

Secondary objectives:

3. To evaluate if MERM-observed therapy provides higher health-related quality-of-life (HRQoL) and lower catastrophic costs compared to the standard DOT
4. To evaluate the patient-reported usability and treatment satisfaction with MERM-observed self-administered TB therapy compared with the standard in-person DOT.

Outcome measures: Primary outcomes:

1. Level of adherence: Individual-level percentage adherence over the two-month intensive phase measured by adherence records compiled from MERM device vs. DOT records.
2. Sputum conversion: Participants with sputum smear converted following the standard two-month intensive phase treatment.

Secondary outcomes

3. Negative IsoScreen urine isoniazid test: Participants having at least one negative urine isoniazid test result (IsoScreen test, GFC Diagnostics Ltd, Bicester, England)
4. Adverse treatment outcome: Participants having at least one of the three

events: treatment not completed; death; or loss to follow-up

5. Self-reported adherence: Participants who self-reported to have forgotten to take their medication
6. Health-related quality of life (HRQoL): The association between MERM-observed therapy and HRQoL, with the HRQoL measured and calculated for each participant by arm using the EuroQoL 5-dimension 5-level (EQ-5D-5L) score ranging from 0 to 1, with a higher score designating better HRQoL.
7. Catastrophic costs: Participants with overall TB treatment cost exceeding or equivalent to 20% of their income.
8. Post-diagnostic cost from an individual patient's perspective: Participant's cumulative direct costs (out-of-pocket costs related to anti-TB drug pick-up) and indirect costs (guardian and coping costs) over the two-month intensive phase.
9. Patient-reported treatment satisfaction: Participant's treatment satisfaction measured using the treatment satisfaction questionnaire for medication version 1.4 (TSQM v1.4) tool on a scale from 0 to 100, with a higher score indicating better satisfaction.
10. Patient-reported usability of the MERM device: Participant's experience using the MERM device measured by an 18-item questionnaire and the score transformed into a scale from 0 to 100, with a higher score indicating better usability (Intervention arm only).

**Methods:** *Design:* A multicenter, randomized, controlled, open-label, non-inferiority, effectiveness-implementation type 2 hybrid trial in ten healthcare facilities in Addis Ababa, Ethiopia. The study will not dictate diagnosis and treatment for TB; thus, it will not introduce or use new medications.

*Setting:* The study country is Ethiopia – a high TB-burden, low-income country located in sub-Saharan Africa. In Addis Ababa, a total of 94 public health centers provide TB care and treatment services under the DOT program. This study stratifies the 94 health centers on the bases of the 10 sub-cities where they are located. From each stratified group, one health center with the largest TB client load will be selected, with a total of 10 health centers to be included. Health management information system (HMIS) quarterly data (April 01 - June 30, 2019) taken from the Addis Ababa Regional Health Bureau will be used for the purpose.

*Participants:* The source population will be all new patients with TB symptoms who come to a study site and undergo bacteriological screening during the study period or TB patients bacteriologically confirmed elsewhere and referred to a study site for TB treatment. Inclusion criteria: i) patients with new, or previously treated, bacteriologically-confirmed drug-sensitive pulmonary TB, ii) eligible to start the

standard 6-month first-line anti-TB medication, iii) outpatient status at the time of screening and enrollment, iv) men or women age  $\geq 18$  years, and v) able and willing to provide informed consent. The sample size calculation yields a sample of 57 in each arm for a total of 114 participants.

**Intervention:** Participants will be randomly assigned (1:1) to receive a 15-day TB medication supply in the evriMED500<sup>®</sup> MERM device to self-administer and return every 15 days (intervention arm) or the standard in-person DOT (control arm). Both will be followed throughout the standard two-month intensive treatment phase (2RHZE). The MERM device has an electronic module and a medication container that records adherence, stores medication, emits audible and visual on-board alarms to remind patients to take their medications on time and refill, and enables providers to download the data and monitor adherence.

**Study Duration:** The study duration is 12 months from opening enrollment until completion of data analyses. Participant duration is 2 months for each individual participant to complete all visits.



140 **1.2. Scheme**

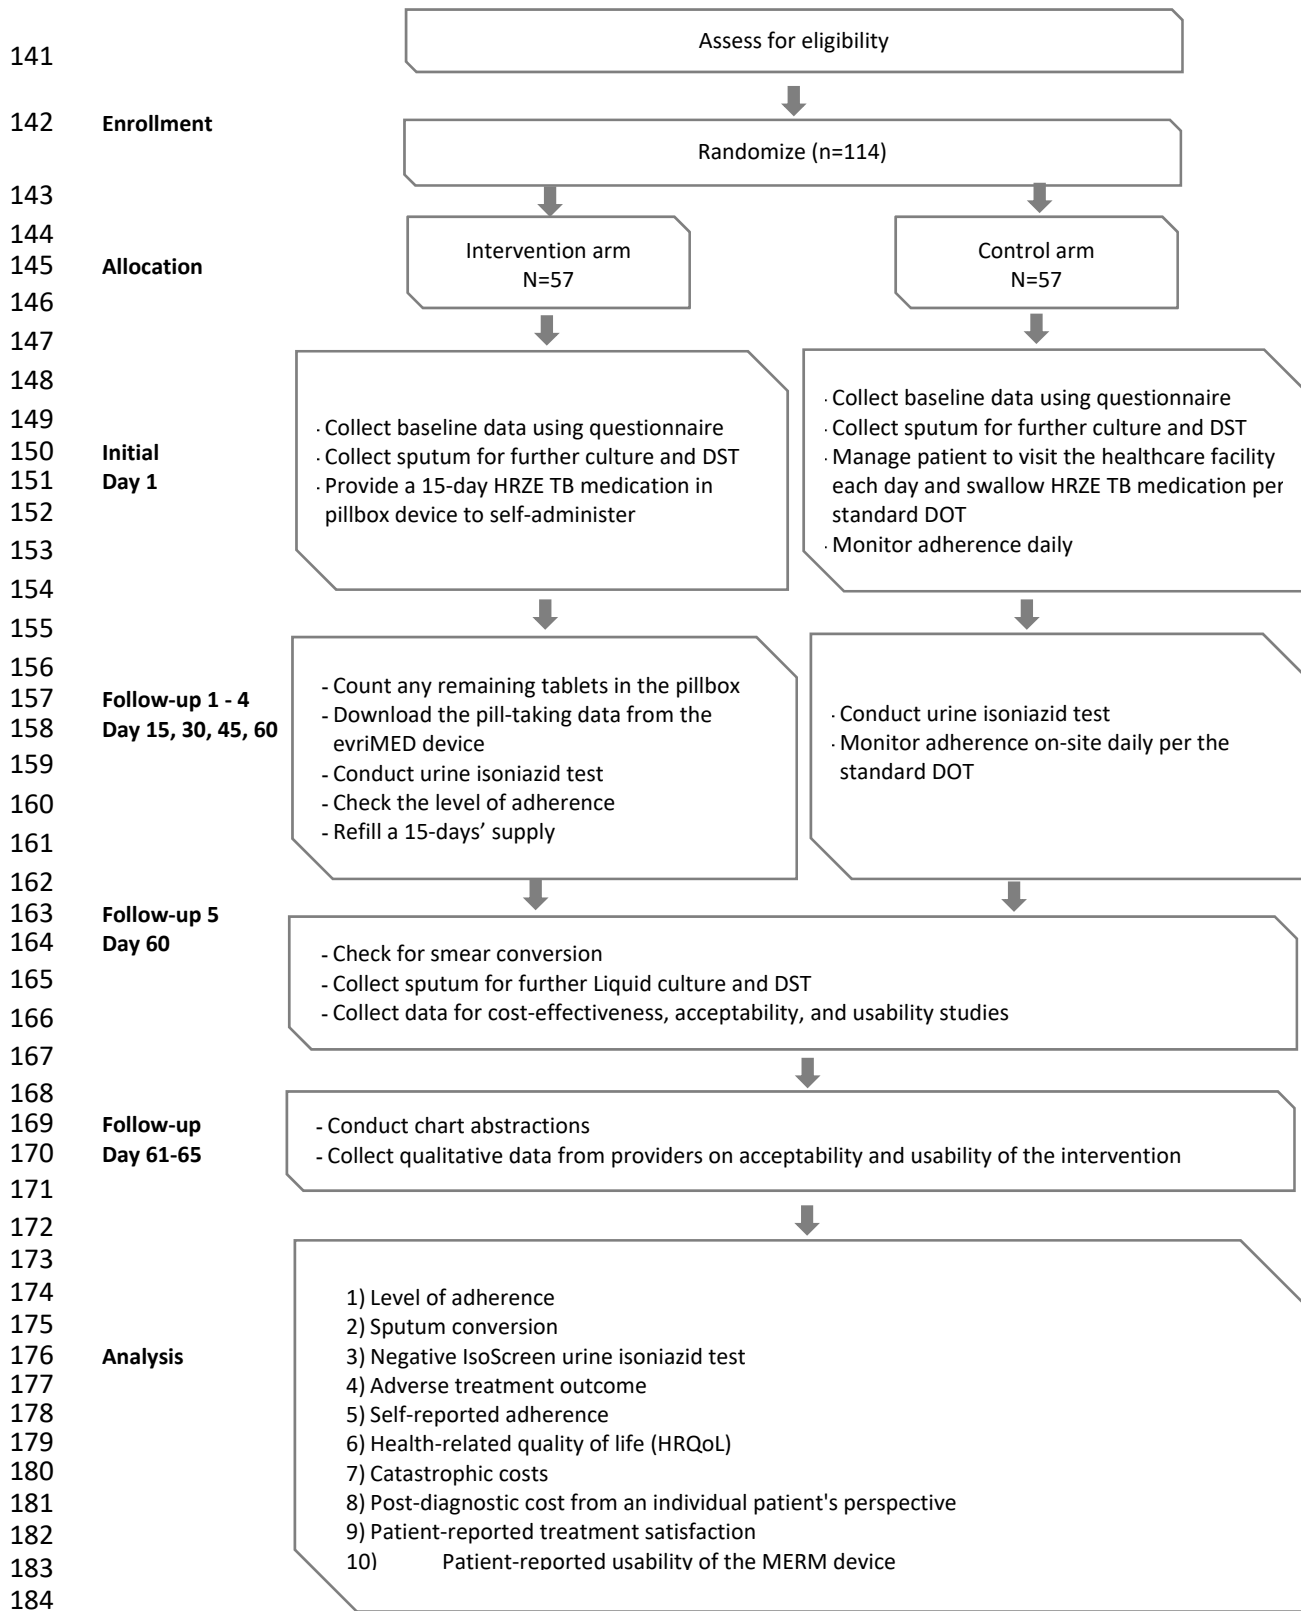

**Figure 1: Schematic diagram of the study**

## 186 2. BACKGROUND

### 187 2.1. Study rationale

188 The World Health Organization (WHO) revealed its commitment to tuberculosis (TB) patients in its End  
189 TB strategy that “everyone with TB should have access to the innovative tools and services they need  
190 for rapid diagnosis, treatment, and care; this is a matter of social justice, fundamental to our goal of  
191 universal health coverage”. This commitment is a collective responsibility towards human rights;  
192 making sure that no family is burdened with avoidable death or catastrophic expenses due to TB by  
193 2030. However, taking pride in the slogan “End TB by 2030” is insufficient for true progress. In order to  
194 translate aspirational goals into reality, practical solutions should be sought. The strategy might  
195 appear to be a zero-sum if interventions on the disease neglect key socioeconomic burdens that  
196 individual patients are incapable of avoiding. The association between TB and poverty is a reality (1-5),  
197 but the disease is a global health security threat that urgently needs collective resources for mutual  
198 welfare (6,7). In the last three decades, different strategies and care packages have been formulated  
199 and implemented to halt the disease. However, improvements are not as expected (8,9); instead, a  
200 drug-resistant form of the disease is spreading [10-12], with globalization and migration fueling  
201 multiple strains of the disease worldwide [13-15]. The main debate here is how we can meet End TB’s  
202 vision of “A world free of TB: zero deaths, disease and suffering due to TB” without bargaining the  
203 inherent values and dignity of TB patients. It remains unclear how low-income countries would be able  
204 to meet one of the four key indicators of the strategy “Zero TB-affected families facing catastrophic  
205 costs due to TB by 2035” in situations where management of TB treatment still relies on directly  
206 observed therapy (DOT).

207 TB patients from the poorer segments of society are not benefiting from care delivery innovations: a  
208 contradiction between “Global Commitment to End TB” and “reality on the ground”. Management of  
209 their treatment still depends on DOT, where controversies are everywhere on its potential turning the  
210 End TB strategy to reality. DOT has been viewed as an efficient strategy for treatment adherence  
211 [16,17], while evidence has demonstrated that it poses an economic and social burden to TB patients  
212 living in low-income countries [18-25]. Treatment of TB lasts for at least six months, where patients in  
213 the intensive phase of DOT need to collect their medication at healthcare facilities daily and swallow  
214 tablets under the direct observation of a healthcare worker throughout the intensive phase. This  
215 process challenges not only patients but also the healthcare system as it is labor-intensive to supervise

216 the daily treatment of large numbers of TB patients [18,19,26], which portend a dystopia in the  
217 epidemiology of the disease.

218 There is no single measurement strategy deemed a universal solution to improve adherence;  
219 however, DOT is yet the only option for management of TB treatment adherence in low-income  
220 countries, despite multi-method approaches used in high-income countries. There is a natural  
221 tendency to focus on patient-related domains as core determinants of TB treatment adherence, while  
222 for other chronic diseases, treatment relies on patient self-management, giving them freedom and  
223 ownership of their own and their communities' health. Adherence is a multidimensional phenomenon  
224 determined by the interplay of five sets of factors, of which patient-related factors are just one  
225 determinant (Figure 2) [27,28]. The common belief that patients are solely responsible for taking their  
226 treatment is misleading and most often reflects a misunderstanding of how other factors affect  
227 people's behavior and capacity to adhere to their treatment. It also places the burden solely on the  
228 patient and stigmatizes and demoralizes the patient who is deemed delinquent or a defaulter when  
229 this breaks down.

Patient-provider relationship,  
Poorly developed health services,  
Poor medication supply systems,  
lack of knowledge and training for  
health care providers,  
Work load,  
lack of incentives and feedback

Co-morbidities,  
Severity of symptoms,  
Drug and alcohol abuse  
level of disability (physical,  
psychological, social vocational),  
Availability of effective treatment

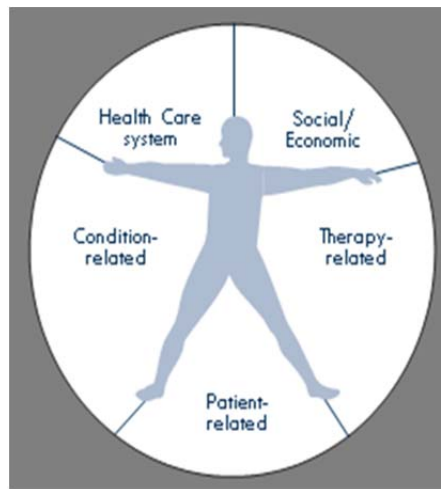

Poor socioeconomic status,  
Poverty  
Homelessness or unstable living conditions  
Unemployment,  
High cost of transport,  
High cost of medication,  
Long distance from treatment center  
Culture and about illness and treatment  
Changing environmental situations,  
Family dysfunction,

Side-effects,  
Duration of treatment,  
Previous treatment failures,  
Frequent changes in treatment,  
Complexity of medical regimen  
Immediacy of beneficial effects,  
Availability of medical support,

Forgetfulness,  
Hopelessness  
Feeling stigmatized from disclosure  
Psychosocial stress  
Negative attitude or belief about the disease  
Fear of dependence  
Low treatment expectations  
Poor knowledge about the disease

230

**Figure 2:** Five dimensions of adherence, adopted from (27, 28)

231 Ethiopia, where the proposed study will be conducted, is among countries highly encumbered by the  
232 TB epidemic, and one of the least resourced in the world. According to the 2018 global TB report,  
233 there were 117,705 TB cases reported in the country, and of the annual \$93 million needed for TB  
234 care and control, the country's domestic contribution was only 11% [29]. Despite TB care and  
235 treatment services being delivered free of charge, TB patients are facing out-of-pocket payments  
236 [30,31] and income losses [32] due to transportation, accommodation, and food to get treatment at  
237 healthcare facilities: tackling their adherence to treatment and forcing them to stop working, sell their  
238 properties, borrow money and reduce their overall income [33]. These, in turn, are increasing rates of  
239 loss to follow-up, disease relapse, and drug resistance [34]. The spread of TB due to patients traveling  
240 daily to healthcare facilities for medication is increasing the transmission potential of the disease,  
241 especially in the capital city Addis Ababa, where mobility is making the city crowded - as manifested  
242 through housing conditions and the public transport. Different studies conducted in Addis Ababa  
243 reported that TB patients consider their daily DOT visits as pointless [35-39], and providers see DOT as  
244 a very challenging strategy for TB patients (37). As a result, daily DOT survives in principle, while  
245 implementation is irregular as both TB patients and providers have uncertainties with it. Providers  
246 witness that TB patients prefer taking the tablets at home once they have the necessary advice and  
247 counseling [35,37]. Patients complain that they travel for daily DOT on foot under exhaustive road  
248 conditions for up to two hours and 2.5 kilometer, taking several rests on their way because of their  
249 sickness (35,38,40). They spend much on transportation [37,41] and some of them get fired from their  
250 job as they were absent for the daily DOT (35,39,40). Providers witness how patients are seen when  
251 they exhaust (35), and patients took their daily DOT with dissatisfaction [39]. Some patients claim that  
252 once they are informed of the disease on day one, no one talks to them the following days and they  
253 just swallow the drug and go back (37). Besides, they face stigma on their way to daily DOT, and they  
254 change their name in the TB clinic for they do not want to be notified as TB patients [41]. The  
255 challenge is similar in other parts of Ethiopia (42-45). According to the WHO 2018 report [29], TB  
256 treatment coverage in the country is 68%, which is minimum even to accommodate the current DOT  
257 need. The estimated percentage of MDR/RR TB cases is significantly higher in previously treated cases  
258 [14% (6.7–25)] than new cases [2.7% (1.6–4.1)]; which indicates that management of TB treatment  
259 under DOT is problematic in the country. There were 680 MDR/RR-TB and four XDR-TB laboratory-  
260 confirmed cases in the country in 2017 (29), while many more were left undiagnosed due to limited  
261 availability of the service.

262 The Ethiopian national TB program adheres to the WHO End TB strategy for its TB functions. The  
 263 national comprehensive TB guideline revised in 2016 (46) standardize the provision of one first-line  
 264 anti-TB treatment regimen for both new and previously treated TB patients. The treatment is  
 265 administered in two phases (Figure 3). The initial (intensive) phase consists of a fixed-dose  
 266 combination of four drugs [(isoniazid (H), rifampicin (R), pyrazinamide (Z) and ethambutol (E), with  
 267 75/150/400/275 mg strength] to be taken for the first eight weeks for new cases. The second  
 268 (continuation) phase consists of a fixed-dose combination (RH, with 75/150 mg strength) to be taken  
 269 for four months for new cases, which may be extended to 10 months if the disease involves the  
 270 central nervous system, bones or osteoarticular spaces. Management of treatment is entirely driven  
 271 by DOT implementation principles and modalities.

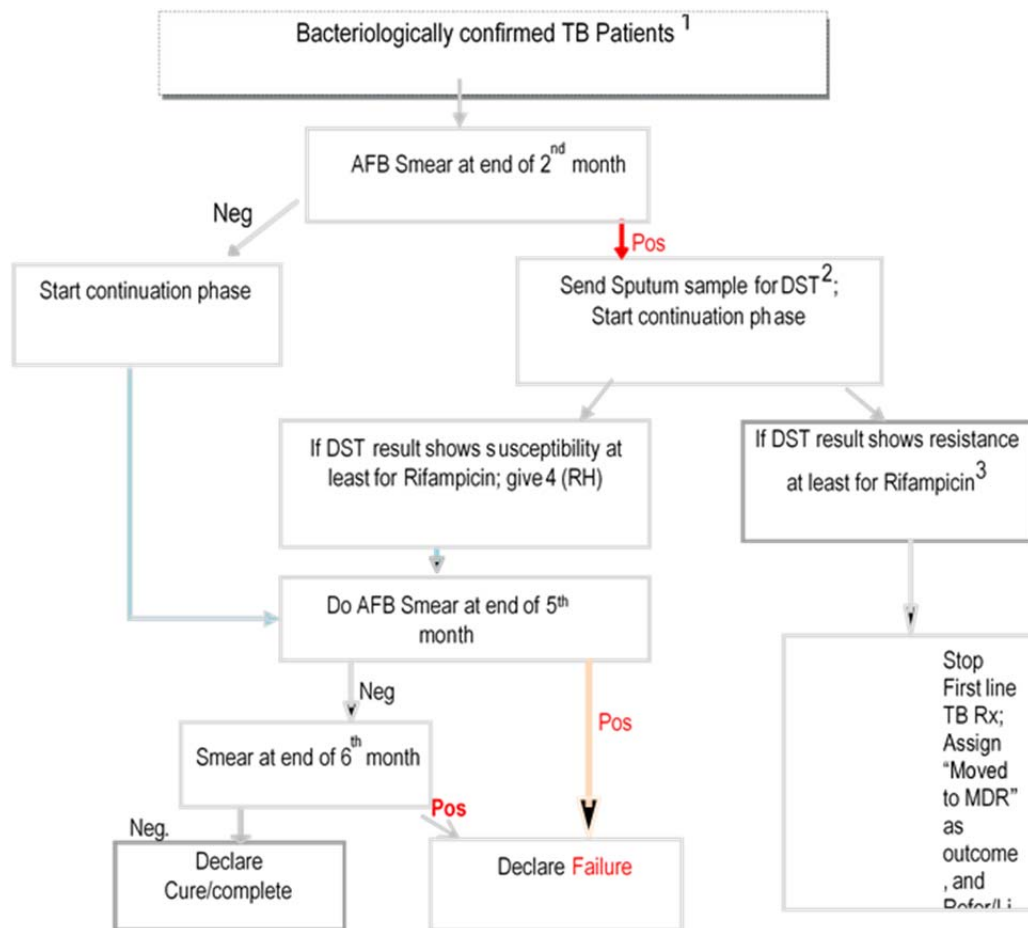

272  
 273 <sup>1</sup>Bacteriologically confirmed TB patients include those diagnosed by a positive result on AFB microscopy, Xpert MTB/RIF Assay or  
 274 culture;<sup>2</sup>DST may be performed from one sputum sample using Xpert MTB/RIF, LPA or conventional DST based on availability. Information  
 275 on rifampicin may be enough to decide on Next Action.<sup>3</sup> if DST result shows resistance to INH but susceptible to Rifampicin; treat with RHZE  
 276 for 9 months.

277 **Figure 3.** Flow Chart for Sputum AFB monitoring for bacteriologically confirmed PTB Patients (46)

278 In Ethiopia, there have been no alternative TB treatment strategies to DOT to address patient-specific  
279 adherence barriers or challenges. This would have a significant impact on the End TB indicator of “Zero  
280 TB-affected families facing catastrophic costs due to TB by 2035”. Besides, Multidrug-resistant TB  
281 (MDR-TB) remains a serious issue in the country, with a high burden [47] and transmission potential  
282 [48]. Such evidence discloses the difficulty of Ethiopia to meeting the overall End TB strategy targets  
283 by 2035 [49] unless significant investment is made to shape the current DOT strategy to a more  
284 advanced, technology-led, patient-centered strategy that could be responsive to individual patient  
285 preferences, needs and values.

286 The challenge with daily DOT is across sub-Saharan African countries, where DOT did not provide a  
287 significant solution to poor treatment adherence; instead, home and community-based therapies  
288 were shown to be possible alternative strategies to health facility DOT as studies held in Tanzania (50-  
289 52), Kenya (53,54), Zambia (55), South Africa (56,57), and Eretria (58) reported. The WHO 2018 Global  
290 TB Report (29) showed that TB remains a leading cause of death in Africa. The continent accounts for a  
291 quarter of new TB cases and TB deaths worldwide, with 2.5 million people falling ill and 417,000  
292 people dying from TB annually. Of the total TB patients co-infected with HIV globally, 72% of them live  
293 in Africa (29). The true burden of DR-TB in the continent is poorly described, with only 51% of  
294 countries having formal data in the WHO global TB database, where DR-TB is largely missed and this  
295 requires a major effort to achieve the 2035 targets (59).

## 296 **2.2. TB Digital Adherence Technologies: evidence in literature**

297 DOT-dependent treatment management alone has shown to be insufficient to ensure medication  
298 adherence and treatment outcomes (60). Understanding this challenge, the global scientific  
299 community has invented Digital Adherence Technologies (DATs) that has transformed DOT to SAT.  
300 Such technologies, in general, have been shown to improve TB treatment outcomes [61-64] and  
301 substantially save costs [65], while available data are yet limited for better conclusions of their  
302 effectiveness in different countries and settings [66-69]. Assessing the TB DATs landscape, and  
303 understanding the barriers of non-adherence in its End TB Strategy, the WHO has endorsed in 2017  
304 three DATs: short message service/mobile phone texting (SMS), Medication Event Reminder Monitor  
305 (MERM), and video-supported Directly Observed Therapy (VDOT) [70]. The SMS involves sending a  
306 standardized and understandable text message to the TB patient regularly to remind and motivate

307 them to take the prescribed medications. MERM involves the use of an electronic pillbox consisting of  
 308 an automated pill container that emits audible and visual alerts to remind patients to take medication  
 309 and transmits a signal to healthcare providers either when the box is opened or when it remains  
 310 unopened for a given time and remotely monitor adherence. MEM pillboxes were in use several  
 311 decades ago to monitor the usage of pill containers of different medications. MERM sleeves (99DOTS  
 312 prototype) have an additional component that each medication blister is wrapped in 99DOTS  
 313 envelopes to send to providers a hidden signal unrecognized by the patient. VDOT involves video  
 314 communication between patients and healthcare providers, where providers watch patients take their  
 315 medication, live or self-recorded, and provide advice and support. VDOT is mediated primarily through  
 316 internet-enabled smartphones, and internet access is a critical component [70].

317 There have been limited studies conducted on DATs. For available studies, effectiveness at different  
 318 resource-limited countries has been a subject of research and controversy. Table 1 summarizes the  
 319 findings of recent studies conducted on the three DATs.

320 **Table 1:** summary of existing literature on TB digital adherence technologies

| Reference                 | Country     | Design              | Outcome measure                | Finding                      |
|---------------------------|-------------|---------------------|--------------------------------|------------------------------|
| <b>SMS</b>                |             |                     |                                |                              |
| Bediang et al 2018 [71]   | Cameroon    | RCT: SMS vs DOT     | Treatment success              | No significant difference    |
| Fang et al 2017 [72]      | China       | RCT: SMS vs DOT     | Treatment completion rate      | High                         |
| Mohammed et al 2016 [73]  | Pakistan    | RCT: SMS vs DOT     | Treatment success              | No significant difference    |
| Liu et al 2015 [74]       | China       | RCT: 4 arms         | Pill count, adherence          | No significant improvement   |
| Iribarren et al 2013 [75] | Argentina   | Cross-sectional     | feasibility and acceptability  | acceptable and feasible      |
| <b>MERM</b>               |             |                     |                                |                              |
| Onwubiko et al 2019 [76]  | USA         | RCT: MERM vs DOT    | Treatment completion           | Low                          |
| Park et al 2019 [77]      | Morocco     | RCT: MERM vs DOT    | Treatment success              | High                         |
| Liu et al 2017 [78]       | China       | Multi-method        | User performance, satisfaction | High                         |
| Broomhead et al 2012 [79] | USA         | Cross-sectional     | Treatment outcome, cost        | High, lower cost per patient |
| Thakkar et al 2019 [80]   | India       | Cohort, 99DOTS used | Treatment adherence            | High                         |
| <b>VDOT</b>               |             |                     |                                |                              |
| Lam et al 2018 [81]       | USA         | RCT: VDOT vs DOT    | Treatment completion           | High                         |
| Garfein et al 2018 [82]   | USA         | RCT: VDOT vs DOT    | Adherence, cost                | High, lower cost             |
| Nguyen et al 2017 [83]    | Vietnam     | Prospective cohort  | Treatment adherence            | High                         |
| Chuck et al 2016 [84]     | USA         | RCT: VDOT vs DOT    | Treatment outcomes             | No significant difference    |
| Garfein et al 2015 [85]   | USA, Mexico | Single-arm trial    | Treatment adherence            | High in both settings        |

RCT: randomized controlled trial; USA: United States of America

321  
322

323 Considering the low-impact of SMS for TB treatment adherence and the high investment and  
 324 technology need of VDOT, this study plans to focus on MERM (electronic pillbox) intervention. It is the  
 325 most commonly used device to promote medication adherence for different diseases. With a pillbox,  
 326 patients can self-manage their medications, identify whether they have taken the dose or not, and  
 327 minimizes the rate of medication errors (28). Previous studies found that people who used a pillbox  
 328 had better treatment adherence (86-88). This device is associated with improvements in medication  
 329 adherence and, subsequently, with better health [86]. MERM electronic pillbox has an additional  
 330 feature of reminding patients to take their drugs with visual and audio alerts, providing information  
 331 about treatment adherence (89). However, there are concerning limitations with MERM, such as  
 332 battery replacement or wireless signaling for sending and receiving messages, that are relevant to  
 333 developing countries like Ethiopia and need further exploration.

334 **3. CONCEPTUAL FRAMEWORK**

335 Figure 4 illustrates the conceptual framework that provides the theoretical basis of the study and  
 336 demonstrates potential outcome and long-term impact on it on End TB if certain conditions are  
 337 fulfilled.

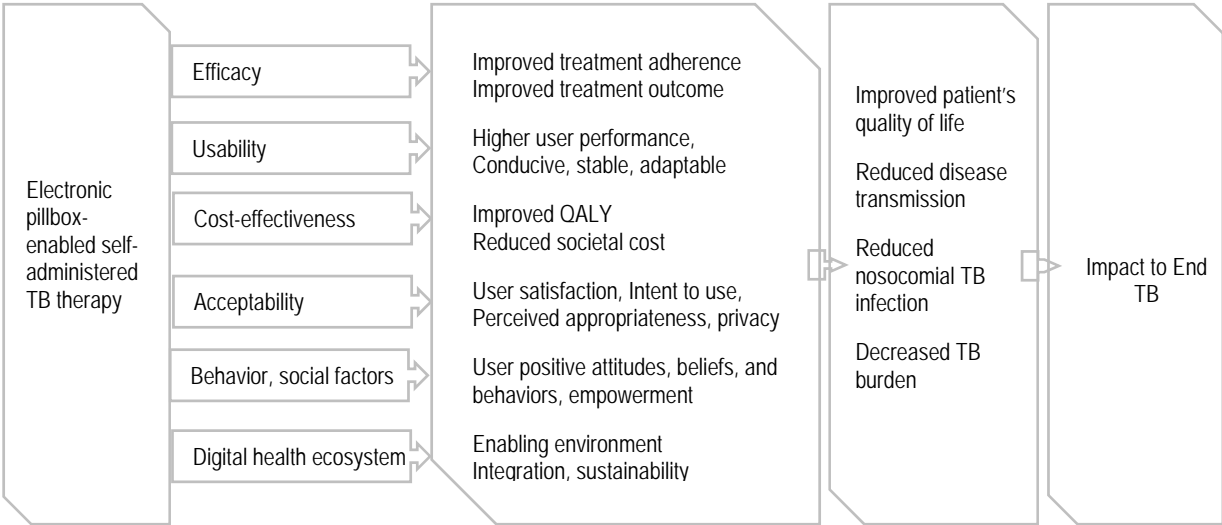

338 **Figure 4:**Conceptual framework of the study

339 This framework applies the functional linkage between TB innovation and the End TB strategy as a  
 340 common ground that any TB intervention should have an ultimate goal realizing the End TB strategy,  
 341 with patient rights “practically” guaranteed. This can be traced to the origins of “empowerment



342 theory” (90) - connecting individual-welling with the larger political and social environments through  
343 which individuals and groups gain greater control over their lives, acquire rights, and reduce  
344 marginalization.

345 The framework is guided by WHO’s recent (2017) handbook for the use of digital technologies to  
346 support tuberculosis medication adherence [70] and the WHO’s 2016 guideline for monitoring and  
347 evaluating digital health interventions [91]. The success of the MERM pillbox as a medication  
348 adherence device relies on its efficacy, usability, cost-effectiveness, acceptability, behavioral and  
349 social determinants of patients and the broader digital health ecosystem of the implementing country.  
350 If these fairly benefits the system, it is likely that TB treatment will succeed, the patient’s quality of life  
351 will be improved, disease transmission and nosocomial transmission will cease, and will reduce  
352 mortality and morbidity due to the disease, and ultimately the End TB strategy will be met.

#### 353 **4. HYPOTHESIS**

- 354 - The use of a digital medication event reminder and monitor device-observed self-  
355 administered therapy provides a non-inferior medication adherence and treatment outcomes  
356 for patients with TB compared with the standard in-person DOT in Ethiopia, one of the low-  
357 income countries with the highest burden of TB

358

359

360

361

362

363

364

365

366

367

368 **5. OBJECTIVES**

369 **5.1. Primary objectives**

370 **5.1.1. Treatment adherence**

371 To assess whether a digital medication event reminder monitor (MERM) device-observed self-  
372 administered therapy improves adherence in patients with TB compared with the standard  
373 DOT.

374 **5.1.2. Treatment outcomes**

375 To assess whether MERM-observed self-administered therapy improves treatment outcomes  
376 in patients with TB compared with the standard DOT.

377 **5.2. Secondary objectives**

378 **5.2.1. HRQoL and catastrophic cost**

379 To evaluate if MERM-observed therapy provides higher HRQoL and lower catastrophic costs  
380 compared to the standard DOT

381 **5.2.2. Usability and treatment satisfaction**

382 To evaluate the patient-reported usability and treatment satisfaction with MERM-observed  
383 self-administered TB therapy compared with the standard in-person DOT

384 **6. OUTCOME MEASURES**

385 **6.1. Primary outcome**

386 **6.1.1. Level of adherence**

387 - Individual-level percentage adherence over the two-month intensive phase measured by  
388 adherence records compiled from MERM device vs. DOT records.

389        **6.1.2.        Sputum conversion**

- 390        - Participant with sputum smear converted following the standard two-month intensive phase  
391        treatment.

392        **6.2.        Secondary outcomes**

393        **6.2.1.        Negative IsoScreen urine isoniazid test**

- 394        - Number of participants with negative IsoScreen urine isoniazid test.

395        **6.2.2.        Adverse treatment outcome**

- 396        - Participants having at least one of the three events: treatment not completed; death; or loss  
397        to follow-up.

398        **6.2.3.        Self-reported adherence**

- 399        - Participants who self-reported to have forgotten to take their medication.

400        **6.2.4.        Health-related quality of life (HRQoL)**

- 401        - The association between MERM-observed therapy and HRQoL, with the HRQoL measured and  
402        calculated for each

403        **6.2.5.        Catastrophic costs**

- 404        - Participants with overall TB treatment cost exceeding or equivalent to 20% of their income.

405        **6.2.6.        Post-diagnostic cost from an individual patient's perspective**

- 406        - Participant's cumulative direct costs (out-of-pocket costs related to anti-TB drug pick-up) and  
407        indirect costs (guardianand coping costs) over the two-month intensive phase.

408        **6.2.7.        Patient-reported treatment satisfaction**

- 409        - Participant's treatment satisfaction measured using the treatment satisfaction questionnaire  
410        for medication version 1.4 (TSQM v1.4) tool on a scale from 0 to 100, with a higher score  
411        indicating better satisfaction.

412 **6.2.8. Patient-reported usability of the MERM device**

- 413 - Participant’s experience using the MERM device measured by an 18-item questionnaire and  
414 the score transformed in to a scale from 0 to 100, with a higher score indicating better  
415 usability (Intervention arm only).

416 **7. SIGNIFICANCE AND TRANSFORMING POTENTIAL**

417 This study will be the first in Ethiopia, and of the three in sub-Saharan Africa, to evaluate the  
418 effectiveness of pillbox-enabled SAT as a multicenter randomized controlled trial. The study will  
419 provide evidence of whether the pillbox-enabled SAT is non-inferior to the standard DOT for  
420 medication adherence and treatment outcomes. The study will assess whether digital adherence  
421 intervention is cost-effective, usable, and acceptable. The study targets TB patients living in Ethiopia -  
422 a high TB burden LMIC in Sub-Saharan Africa where alternative TB treatment strategies to in-person  
423 DOT do not exist.

424 If effective, this approach could substantially improve treatment adherence, increase sputum  
425 conversion, reduce patient-side costs due to daily DOT, and improve quality of life. It could also have a  
426 strong public health impact by reducing transmission of the disease to healthcare providers and the  
427 community at large as the approach can reduce patients’ daily travels to healthcare facilities for in-  
428 person DOT. This approach will provide TB patients freedom and ownership of their treatment, which  
429 ultimately reduces mortality and morbidity thereby contributing significantly to the End TB Strategy.  
430 The findings will enable patients, healthcare providers, and policymakers to make informed decisions  
431 about the value of the intervention.

432 The study intends to use several clinical, biomedical, behavioral, and economic measurement tools to  
433 learn extensively about the desired outcomes of interest. The assessment of adherence using  
434 electronic, self-report, and biological specimens will provide credible and reliable justification of  
435 results. The diagnostic tools we plan to use are WHO-approved, and the questionnaires are valid and  
436 psychometrically sound for use in a local context. The study will collect original data from both  
437 patients and their TB care providers in local facilities, providing substantial evidence on the usability  
438 and acceptability of the intervention in real-world settings.

439 If the intervention arm is found non-inferior to DOT, the investigators will present the findings to the  
440 Ethiopian Federal Ministry of Health and work with the Bureau to scale up the intervention to larger

441 healthcare facilities in Ethiopia. The investigators will also work with the World Health Organization  
442 and donor agencies to see and discuss the scalability of the intervention to other high TB burden  
443 countries in Sub-Saharan Africa.

## 444 8. METHODS

### 445 8.1. Materials

446 The equipment for this study is an electronic pillbox, evriMed500 digital medication monitoring and  
447 reminder device manufactured by Wisepill Technologies, South Africa (Figure 5) [92]. It was developed  
448 with funding from the Bill & Melinda Gates Foundation and is currently in use in clinical trials and in  
449 clinical practice. The evriMED medication adherence device is an affordable and TB-appropriate digital  
450 medication adherence tool that has been tested extensively and is being used in India and China for  
451 TB patients (92). It costs less than 10 USD per patient based on conservative reuse assumptions, and it  
452 could easily be integrated into existing national health data systems [93]. The device is TB-appropriate  
453 technology to permit customization of the container for Drug-susceptible-TB, MDR-TB and TB-HIV  
454 patients.

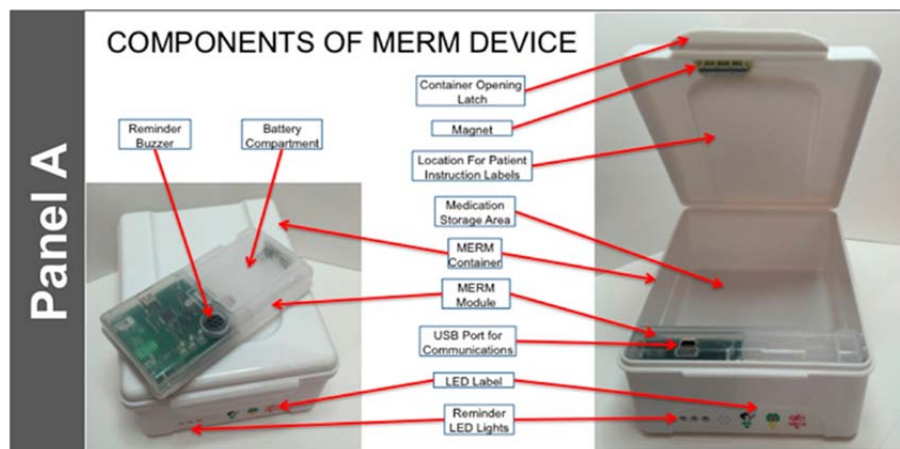

455  
456 **Figure 5:** Electronic pillbox for adherence monitoring: components of the MERM module and its location in the  
457 container in which the medication blister cards are stored (91)

458 The evriMED500 dispenser consists of two hardware components, namely the electronic module and  
459 the medication container. This modular design allows the electronic module to be reused and the  
460 container to be replaced if needed. The electronic module slots into the container so that the  
461 indicator LEDs are visible through the front of the container. A USB port can be accessed by opening

462 the container. The electronic module has a USB port for downloading data and for configuration of the  
463 unit.

464 The container has three Indicator Lights/LEDs (green, yellow, and red). The green LED will flash once  
465 when the container is opened and again once when the container is closed; will quickly flash three  
466 times when the container is opened and closed quickly; will flash in sequence during the (daily)  
467 Medication Alarm; and will be on solid, while connected via USB to the computer. The Yellow LED is to  
468 refill medication and will flash with the Green LED at the time of the medication alarm. If the  
469 Medication Alarm is not enabled, only the yellow LED will flash. It will be on solid when the container  
470 is opened. The Red LED flash is for the battery, and it will flash with the Green LED at the time of the  
471 Medication Alarm. It will be on solid when the container is opened.

472 The device has a medication intake event in an electronic record that is created when a patient opens  
473 the device to take his or her medication. It consists of a date-and-time stamp. The dispenser provides  
474 an electronic heartbeat to a central management system whenever medication is taken, and this also  
475 indicators that the device was functioning during that period.

476 The alarm period is 30 minutes in length and consists of three-alarm cycles. The alarm cycles are 10  
477 minutes each and made up of two parts. These alarms apply regardless of the type of reminder  
478 selected. The first five minutes of the alarm cycle is the active alarm. During the active alarm, the  
479 buzzer will sound, and the green LED will flash in the following sequence: short, short, long. The yellow  
480 LED will flash if the "Refill Alarm" is configured and the date is less than or equal to the current date.  
481 The second five minutes of the alarm cycle is the passive alarm. During the passive alarm, the buzzer  
482 will not sound, and the green LED will not flash. The yellow LED will continue to flash if the "Refill  
483 Alarm" is configured and the date less than or equal to today. Opening the container will cancel the  
484 active alarm if it is opened within four hours before the scheduled alarm or if it is opened during the  
485 alarm period.

486 The evriMED500 makes use of two AA batteries which should last for more than 12 months.  
487 Regarding storage capacity, it can store more than 12000 records/events. The evriMED PC Application  
488 is configured by the evriMED PC Application and it allows a direct connection to the evriMED device  
489 via a USB cable. Specification of the evriMED500 is summarized in table 2.

490

491

492

493

494

**Table 2:** Summary of evriMED500 specification

| <b>Item</b>                                              | <b>Specification</b>                                                    |
|----------------------------------------------------------|-------------------------------------------------------------------------|
| Data Storage                                             | 12000 records                                                           |
| Battery Life (Alkaline)                                  | 12+ months                                                              |
| Power requirements                                       | Two AA batteries                                                        |
| Weight: Module + Standard Battery and Standard Container | 280g                                                                    |
| Dimension: Standard Container                            | 166.9 mm x 129 mm x 71.4 mm                                             |
| Dimension: Module                                        | 119.8 mm x 60.6 mm x 19.5 mm                                            |
| Material                                                 | Polypropylene Copolymer                                                 |
| Temperature range                                        | The Operating range is 0 to +50°C The storage temperature is 0 to +70°C |
| Relative Humidity                                        | 20% to 65% non-condensing                                               |
| Shock Resistance                                         | Withstands a one-meter drop onto a solid surface                        |
| Protection from Liquids and Dust                         | Dust and splash resistant                                               |
| Vibration                                                | 10 ~ 55Hz and amplitude 0.35mm                                          |
| Safety                                                   | IEC 60950-1:2013                                                        |

495

## 496 **8.2. Trial design**

497 The study will be a prospective, multicenter, randomized, controlled, non-inferiority, effectiveness-  
498 implementation hybrid type 2, two-arm trial. The study will not dictate diagnosis or treatment for TB;  
499 thus, it will not introduce or use new medications. Systematic and desk review methods will guide the  
500 study aimed at exploring the digital health ecosystem in Ethiopia.

## 501 **8.3. Setting**

502 Ethiopia is structurally divided into 11 autonomous administrative divisions. Addis Ababa, the capital,  
503 is among these administrative divisions and is the largest city of Ethiopia with the status of both a city

504 and state. Addis Ababa is considered by some to be the capital of Africa, as it is a seat for the African  
 505 Union headquarters and other international and regional organizations including the Africa Centers for  
 506 Disease Control and Prevention. Administratively, Addis Ababa is divided into 10 sub-cities with  
 507 distinct locations. As the city is crowded with population and housing, there is a high risk of TB  
 508 transmission. The national health and health-related indicator [94] reports that in 2016, 2,290  
 509 bacteriologically confirmed TB cases were identified in the city, of which 1,811 (79.1%) completed  
 510 their treatment and 1,526 (66.6%) were cured. For these reasons, Addis Ababa was chosen as the  
 511 study setting.

#### 512 **8.4. Site selection**

513 In Addis Ababa, a total of 94 public health centers provide TB care and treatment services under the  
 514 DOT program. This study stratifies the 94 health centers on the bases of the 10 sub-cities where they  
 515 are located. From each stratified group, one health center with the largest TB client load will be  
 516 selected, with a total of 10 health centers to be included. Health management information system  
 517 (HMIS) quarterly data (April 01 - June 30, 2019) taken from the Addis Ababa Regional Health Bureau  
 518 will be used for the purpose. This will give a representative sample of study sites and participants. A  
 519 TB clinic in each center will serve as the study site and primary location for patient contact for that  
 520 center. Table 3 lists out the 10 public health centers.

521 **Table 3:** Study sites

| S. No. | Name of Health Center       | Sub-city      | # PTB cases<br>bacteriologically<br>confirmed or referred<br>from other sites for<br>initiation of TB<br>treatment, April 01 -<br>June 30, 2019 |
|--------|-----------------------------|---------------|-------------------------------------------------------------------------------------------------------------------------------------------------|
| 1.     | Addis Raey Health Center    | Addis Ketema  | 41                                                                                                                                              |
| 2.     | Akaki Health Center         | Akaki Kality  | 47                                                                                                                                              |
| 3.     | Kebena Health Center        | Arada         | 14                                                                                                                                              |
| 4.     | Goro Health Center          | Bole          | 31                                                                                                                                              |
| 5.     | Adisu Gebeya Health Center  | Gulele        | 22                                                                                                                                              |
| 6.     | Kazanchis Health Center     | Kirkos        | 19                                                                                                                                              |
| 7.     | Alem Bank Health Center     | Kolfe         | 38                                                                                                                                              |
| 8.     | Teklehaymanot Health Center | Lideta        | 22                                                                                                                                              |
| 9.     | Woreda 02 Health Center     | Nifasik lafto | 53                                                                                                                                              |
| 10.    | Woreda 13 Health Center     | Yeka          | 35                                                                                                                                              |



522

523 The sub-cities selected should be willing and capable of participating in the study. If any health facility  
524 fails to do so, the study will consider the next facility with a large TB patient load. TB clinics in each of  
525 the study sites will be the primary sites for patient contact.

526 The study will be held as a collaborative undertaking between Addis Ababa University (Ethiopia) and  
527 Emory University (USA), and investigators from both institutions will take part in the study.

## 528 **8.5. Study participants**

529 The study participants are TB patients and their healthcare providers, while the primary participants  
530 are TB patients. Objectives of the study related to medication adherence and treatment outcomes will  
531 rely solely on data collected from patients, while objectives related to usability, cost-effectiveness,  
532 acceptability, and behavioral and socio-cultural factors will rely on data collected from both patients  
533 and providers.

### 534 **8.5.1. Study participants (TB patients)**

#### 535 **8.5.1.1. Study population**

536 The efficacy studies target TB patients. The source population will be all new patients with TB  
537 symptoms who come to a study site and undergo bacteriological screening during the study period or  
538 TB patients bacteriologically confirmed elsewhere and referred to a study site for TB treatment.

#### 539 **8.5.1.2. Inclusion criteria**

540 Inclusion criteria will include:

- 541 - Patients with new, or previously treated, bacteriologically-confirmed drug-sensitive
- 542 pulmonary TB
- 543 - Eligible to start the standard 6-month first-line anti-TB medication
- 544 - Outpatient status at the time of screening and enrollment
- 545 - Men or women age  $\geq 18$  years
- 546 - Able and willing to provide informed consent

#### 547 **8.5.1.3. Exclusion criteria**

548 The exclusion criteria will include:

- 549 - Patients with known DR-TB
- 550 - Any condition that causes cognitive impairment such as severe acute illness or injury,
- 551 developmental retardation, or severe psychiatric illness and thus precludes informed consent
- 552 or safely participating in the study procedures
- 553 - Inpatient status at the time of screening and enrollment
- 554 - Expected to move away from the study site or become incarcerated before the final study
- 555 follow up at month two
- 556 - Concurrent extra-pulmonary TB
- 557 - Contraindicated medications
- 558 - Active liver disease that requires a TB regimen other than HREZ - isoniazid, rifampicin,
- 559 pyrazinamide, and ethambutol.

560 **8.5.1.4. Justification for inclusion and exclusion**

561 DR-TB patients take TB medications over a long time and as an inpatient, thus are unable to  
562 experience SAT. Similarly, inpatients, as they are admitted and assigned a bed to receive treatment  
563 and care, are unable to effectively experience the SAT.

564 **8.5.1.5. Sampling and sample size**

565 The sample size is calculated considering a 1-sided type I error of 2.5%, a power of 80%, 10%  
566 attrition rate, delta of 20%, non-inferiority margin, and a continuous outcome of percentage  
567 adherence over the two-month intensive phase, with a standard deviation of 36% and 79% of average  
568 adherence [31], assuming null hypothesis for both arms. The results yield a sample size of 57 in each  
569 arm for a total of 114 participants. We will do a  $\log_{10}$  transformation on the data, where a difference  
570 can be equivalently transformed into a ratio using a power ( $10^a$ ). The non-inferiority will be calculated  
571 as the log in the control minus the log in the intervention, which is equivalent to the log of the control  
572 divided by intervention.

573 **8.5.2. Provider participants**

574 **8.5.2.1. Study population**

575 Here, the source population will be healthcare providers who give TB treatment in public health care  
576 facilities. The study population is all adults in the study sites who are currently providing TB treatment  
577 under DOT.

578 **8.5.2.2. Inclusion criteria**

579 Inclusion criteria will include:

- 580 - A healthcare provider with academic qualification as a medical doctor, health officer (BSc), or
- 581 nurse (BSc or Diploma);
- 582 - At least three months of experience providing DOT services in the facility;
- 583 - Able and willing to provide informed consent

584 **8.5.2.3. Exclusion criteria**

585 The exclusion criteria are:

- 586 - Not trained or is not familiar with DOT,
- 587 - Expected to move away from the facility before completion of enrolment of study patients

588 **8.5.2.4. Justification for inclusion and exclusion**

589 Health care providers who are not trained on DOT or do not have experience of the service would not  
590 be able to share their experience on DOT and handle patients per the need. A healthcare provider  
591 who is already known to leave the facility before completion of the study would interrupt the data  
592 collection process and affect the quality and outcome of the study.

593 **8.5.2.5. Sampling and sample size**

594 The study intends to involve 10 health facilities. Thus, a total of 10 healthcare providers, one from  
595 each, who are providing DOT in the data collection period will be identified purposively and enrolled.  
596 A list of reserves, one from each facility, will be kept to engage in case of any provider missing.

597 **8.6. Interventions**

598 Participants in the intervention arm will receive a 15-days TB medication supply (HRZE fixed-dose  
599 combination therapy of 15 doses) in an electronic pillbox device (evriMed500 digital medication  
600 monitoring and reminder device manufactured by Wisepill Technologies, South Africa) to self-  
601 administer. Providers will collect baseline data, including demographic, socioeconomic, behavioral,  
602 and social factors using the study's baseline questionnaire. Based on the baseline data, participants  
603 will be clustered into four behavioral determinants (use cigarettes, alcohol, Khat - a psychostimulant  
604 plant, and cocaine/marijuana) and three social determinants (homeless, unemployed, and illiterate) as

605 appropriate for the purpose of analysis. Participants in this arm will return every 15 days, where the  
606 provider will count any remaining tablets in the pillbox, download the pill-taking data from the  
607 Wisepill device, evaluate the functionality of the device and troubleshoot as needed, and perform the  
608 urine isoniazid test. The level of adherence in their intensive phase of treatment will be calculated  
609 using the medication possession ratio (MPR) [91]. Any participant who misses more than five tablets in  
610 any 15-day refills will be reassigned to daily DOT throughout the remaining days of the intensive  
611 phase. Participants in the intervention arm can consult the healthcare provider in cases of medical  
612 illness or any adverse events outside of a scheduled visit before the next appointment. The phone  
613 number of the healthcare provider following their TB condition will be written at the backside of their  
614 appointment cards. The phone call strategy aims to maintain the DOT advantage for the intervention  
615 arm.

616 Participants in the control arm will get their treatment as per the standard practice of DOT, where  
617 participants will visit the healthcare facility each business day throughout the two months intensive  
618 phase to swallow their daily dose of HRZE with direct observation by the healthcare provider.  
619 Additionally, they will be given pills for the weekend to take them at home. The provider will collect  
620 baseline data, conduct a urine isoniazid test every 15-days, and cluster participants into behavioral  
621 and social determinants as applicable for participants in the intervention arm. For this arm, the  
622 management of participants who interrupt treatment will follow the national TB treatment guidelines.

623 Both arms will be followed up throughout the intensive phase which lasts for two months. The  
624 continuation phase (4 months) will follow the standard DOT practice for both arms. Both arms will  
625 have a TB care and treatment service free of charge, and the pillbox will be given to each participant in  
626 the intervention arm free of charge. For both arms, participants will receive treatment according to  
627 Ethiopian national TB treatment guidelines.

## 628 **8.7. Study procedure**

629 The main data collection tools will include

- 630 - a baseline patient information questionnaire (demographic, socioeconomic, behavioral, social,  
631 and clinical information),
- 632 - medication adherence measurement tools (MERM vs. DOT daily treatment adherence  
633 monitoring tool and urine colorimetric isoniazid test - IsoScreen™ test, GFC Diagnostics Ltd,  
634 Bicester, England, and adherence self-report questionnaire),

- 635 - clinical measurement tools (pre-post treatment sputum Xpert MTB/RIF assay or microscopy  
636 and adverse treatment outcome monitoring tool),
- 637 - cost/economic tools (health-related quality of life [HRQoL], catastrophic cost, post-diagnostic  
638 cost from an individual patient's perspective, predictors of HRQoL and catastrophic costs,
- 639 - Usability and treatment satisfaction tools (treatment satisfaction questionnaire for medication  
640 version 1.4 (TSQM v1.4) tool and an 18-item treatment satisfaction questionnaire

641 The study investigators will identify healthcare providers in the TB clinics and provide training on the  
642 study procedures, how to operate the evriMED500 device, and perform a urine isoniazid test. The  
643 investigators will perform a 1:1 randomization of participants before the start of the study using  
644 computer-generated random numbers. Providers will enroll participants in the two arms sequentially  
645 as they arrive in the clinic and the investigators will routinely monitor the process. Providers will  
646 provide instruction using the Amharic version of the study's participant information sheet. Providers  
647 will recruit participants and obtain written informed consent in the local language, which is Amharic.  
648 The consent form will also function as an acknowledgment of personal responsibility keeping the  
649 device properly and returning upon completion of the study.

650 For both arms, the providers will collect baseline data, including demographic, socioeconomic,  
651 behavioral, and social determinants social using the study' baseline questionnaire. For participants in  
652 the intervention arm, the providers will orient participants in the intervention arm as they enroll  
653 about how to use the evriMED500 device. The orientation time will depend on the efficiency of the  
654 participants to fully acquire and demonstrate the necessary skills. Providers will then dispense a 15-  
655 days TB medication supply (HRZE fixed-dose combination therapy of 15 doses) to participants within  
656 the evriMed500 device for self-administration. Providers will collect sputum specimens from  
657 participants; write their cell phone numbers at the backside of participants' appointment cards to  
658 communicate in cases of medical illness or any adverse events before the next appointment, and  
659 inform them to return every 15 days. When participants returned, the providers will count any  
660 remaining tablets in the pillbox, download the pill-taking data from the evriMED device, check  
661 functionally of the device, and conduct a urine isoniazid test. The providers will fill out the study's  
662 adherence follow-up form to capture information if the drugs are taken every day, and if not, the  
663 reasons for non-adherence. The providers will then evaluate the level of adherence based on the  
664 preset criteria, and refill a 15-day TB medication supply in the same pillbox as appropriate. The  
665 providers will collect sputum specimens from participants at the end of the intensive phase.

666 For the control arm, providers will handle participants according to the standard DOT procedure,  
667 where participants will visit the healthcare facility each business day in the intensive phase to swallow  
668 their daily dose of HRZE with direct observation by the provider. The providers will fill out a similar  
669 adherence follow-up form for the control arm. Additionally, if a participant in the control arm requests  
670 medications for self-administration, the provider will collect information about the date requested  
671 and for how many days requested on the follow-up form.

672 For the control arm, in addition to monitoring medication adherence, a separate secondary analysis  
673 will be conducted for any doses that are self-administered after approval from their provider to  
674 determine if this approach has an impact on other outcome measures. This will be to determine the  
675 real-world practice of in-person DOT where some doses might be self-administered when the provider  
676 approved this procedure for extenuating circumstances.

677 The participants will have IsoScreen™ urine isoniazid test every 15 days, which is a colorimetric  
678 assay, whereby the pyridine ring structure of isoniazid and its metabolites is broken by the  
679 biochemical reaction leaving it vulnerable to attachment by the condensing agent, barbituric acid.

680 At the end of the intensive phase, trained research experts will complete several data instruments for  
681 all participants. The first is a self-report of medication adherence that the experts will administer. The  
682 second is a case report form for which data will be extracted from TB registration logs and  
683 participants' charts, focusing on overall treatment outcomes and side effects. For the third  
684 instrument, the experts will administer the EuroQol's EQ-5D-5L HRQoL questionnaire to all  
685 participants. The experts will also assess patients' costs using the Tool to Estimate Patients' Costs.  
686 Then the experts will administer the TSQM version 1.4 tool to determine treatment satisfaction.  
687 Finally, the experts will administer the 18-item tool to determine user performance of the MERM  
688 device for intervention participants. Following the collection of data from participants, the study  
689 investigators will collect qualitative and quantitative data from the providers to learn more about the  
690 usability and acceptability of the intervention from providers and the healthcare system perspectives.  
691 The investigators will follow-up and capture ongoing data on the status of each pillbox, thus from the  
692 distribution of the pillboxes to end of data collection.

693 For the laboratory research involving biological specimens (urine and sputum), the study will use  
694 WHO-approved diagnostic tools. The IsoScreen test is a semi-quantitative urine test that provides a  
695 reliable and immediate indication of adherence to isoniazid-containing treatment regimens for

696 patients with TB. It uses the reagents of the Arkansas Method: barbituric acid (20 mg), potassium  
697 cyanide (10 mg) and chloramine-T (10 mg), in an enclosed plastic testing device for safe and rapid  
698 testing in clinics and patients' homes. A urine sample is added to the plastic testing device. If the  
699 sample develops a blue color, it is positive for isoniazid metabolites and is therefore from a patient  
700 who is compliant with the treatment. A blue/purple color indicates that the drug was taken within the  
701 last 24 hours. A green color also indicates isoniazid metabolites, but the drug was probably taken  
702 about 48 hours ago. If the sample remains yellow, then the patient is not adhering to their daily  
703 treatment. The providers will perform this test within the study facilities for both arms every 15 days,  
704 thus four times per participant. Sputum specimens collected before and after the intensive phase.  
705 Under the routine practice, the sputum samples will be tested for Acid-fast bacilli (AFB) microscopy to  
706 check for sputum smear conversion following the intensive phase. Initiation, termination or  
707 completion of treatment will rely only on the standard procedures available at the study sites, which  
708 could be acid-fast bacilli or Xpert MTB/RIF assay. Thus, the outcomes of the study's laboratory results  
709 will not dictate the standard diagnostic or treatment procedures.

## 710 **8.8. Definition of terms**

### 711 **8.8.1. Medication adherence**

- 712 - The extent to which patients take their medications as prescribed with respect to dosage  
713 and dosage intervals throughout the treatment period (70, 100)

### 714 **8.8.2. Effectiveness**

- 715 - The ability of a digital health intervention to achieve the intended results (70)

### 716 **8.8.3. Cost-effectiveness**

- 717 - Comparison of two alternatives where consequences of the intervention are measured in  
718 natural units (70)

### 719 **8.8.4. Usability**

- 720 - the capability in human functional terms to be used easily and effectively by the specified  
721 range of users, given specified training and user support, to fulfill the specified range of  
722 tasks, within the specified range of environmental scenarios (70).

723 **8.8.5. TB patient**

724 - An individual diagnosed with active TB disease (pulmonary or extrapulmonary) (101).

725 **8.8.6. TB patient cost**

726 - Survey of costs faced by TB-affected patients and their households (102).

727 **8.8.7. New cases**

728 - A newly registered episode of TB in a patient who has never been treated for TB or has  
729 taken anti-TB medicines for less than 1 month (103).

730 **8.8.8. Bacteriologically confirmed TB case**

731 - A patient from who has at least one positive result either by smear microscopy, culture or  
732 Xpert MTB/RIF assay (46).

733 **8.8.9. Loss to follow-up**

734 - Patients have previously been treated for TB and were declared lost to follow-up at the  
735 end of their most recent course of treatment and are now diagnosed with TB (46).

736 **8.8.10. Treatment completed**

737 - A TB patient who completed treatment without evidence of failure BUT with no record to  
738 show that sputum smear or culture results in the last month of treatment and on at least  
739 one previous occasion were negative, either because tests were not done or because  
740 results are unavailable.

741 **8.8.11. Healthcare facility**

742 - Any establishment of facility (public or private) that is engaged in direct care of patients  
743 on site (101).

744 **8.9. Data management**

745 The study will use a password-protected offline Research electronic data capture (REDCap) database,  
746 Vanderbilt University, United States [105] to enter data and store entered data in an encrypted drive.



747 The Principal Investigator will keep the source data in a locked cabinet at the study's central office.  
748 The assigned study staff will check a random sample of 10% of all data entry forms for entry errors.

## 749 **9. STATISTICAL ANALYSIS**

750 Descriptive summary measures will be used to report participant characteristics. Chi-square tests will  
751 be used to evaluate potential associations among categorical variables. To compare the level of  
752 adherence between study arms and among variables, independent t-tests will be done on log-  
753 transformed adherence percentage of the expected 60 days. Effects of the arms and other adherence  
754 variables will be estimated using a geometric mean (GM) with geometric standard deviation (GSD) and  
755 mean ratios (MR) with 95% confidence intervals (CI). Log binomial regression will be conducted to  
756 identify risk factors of at least one negative isoniazid urine test and self-reported adherence of  
757 participants. Effects will be measured using adjusted relative risk (ARR) with 95%CI. A general linear  
758 model will be done on log-transformed adherence percentage to identify the effects of variables on  
759 participants' level of adherence. Effects will be measured using an adjusted mean ratio (AMR) with  
760 95% CI.

761 Descriptive statistics including frequency and percentage will be used to describe the health state of  
762 the study participants. Multiple bar charts with cross-tabulation will be used to illustrate distributions  
763 of health states by study arms. Chi-square and Fisher's exact tests will be employed to compare the  
764 five EQ-5D-5L health domains by study arms. Kolmogorov-Smirnov, Shapiro-Wilk tests, and median  
765 values with interquartile range (IQR) will be used to summarize EQ-5D-5L index value/utility.  
766 Nonparametric Mann-Whitney U test will be employed to compare the difference in EQ-5D-5L index  
767 value/utility among study arms. A log-binomial model will be used to identify risk factors for lower  
768 HRQoL, which is having at least one health problem.

769 The overall TB treatment cost will be estimated by considering costs related to anti-TB drug pick-up,  
770 guardian costs, and coping costs over the two-month intensive phase. The proportion of study  
771 participants who faced catastrophic costs at a cut-off point of 20% will be estimated. A cross-  
772 tabulation will be employed to evaluate the distribution of catastrophic cost over the study arms and  
773 chi-square test will be used to test the association between catastrophic cost and study arms.

774 To compare the TSQM scores between study arms, independent t-tests will be done on log-  
775 transformed scores. Effects of the arms will be estimated using a geometric mean (GM) with  
776 geometric standard deviation (GSD) and mean ratios (MR) with 95% confidence intervals (CI). A

777 general linear regression will be done on log-transformed TSQM scores to identify the effects of  
778 variables on participants' level of satisfaction. Effects will be measured using an adjusted mean ratio  
779 (AMR) with 95% CI. In all analyses, a 5% significance threshold will be used to determine statistical  
780 significance.

## 781 **10.QUALITY ASSURANCE**

782 The investigators will generate, document, and report the trial in compliance with the protocol, GCP  
783 guideline, and applicable national and international (US NIH) regulatory requirements. External  
784 monitors may do technical audits, before, during, and after completion of the trial. This will include  
785 reviewing the research protocol, operations manual, standard operating procedures, and training  
786 materials before initiation of the trial. The site investigators will make study documents and pertinent  
787 records readily available for inspection by the local IRB and site monitors. The study sponsor may  
788 conduct monitoring or auditing of study activities to ensure the scientific integrity of the study and to  
789 ensure the rights and protection of study participants. Monitoring and auditing activities may be  
790 conducted by the sponsor (internal), authorized representatives of the sponsor (external) or both.  
791 Monitoring or auditing may be performed by means of on-site visits to the Investigators' facilities or  
792 through other communications such as telephone calls or written correspondence. The visits will be  
793 scheduled at mutually agreeable times, and the frequency of visits will be at the discretion of the  
794 sponsor. During the visit, any study-related materials may be reviewed and the Investigators along  
795 with study healthcare providers will be available for discussion of finding. The study may also be  
796 subject to inspection by regulatory authorities (national or foreign) as well as the IRBs to review  
797 compliance and regulatory requirements. Given that the study is neither dictating the need for or  
798 treatment of TB diagnosed by the screening, serious adverse events (SAEs) will not be directly  
799 attributable to the study.

## 800 **11.STUDY ASSESSMENT AND DISCONTINUATION**

### 801 **11.1. Participant discontinuation**

- 802 - There will be premature study discontinuation if there is:
- 803 - Refusal of study participants to participate in all components of the study;
- 804 - A request by the participants to withdraw;
- 805 - A request from the healthcare providers if s/he thinks the study is no longer in the best
- 806 interest of the participants; or

807 - At the discretion of the IRB/Ethics Committee, regulatory bodies, sponsor or consensus of the  
808 investigators.

## 809 **11.2. Unexpected or adverse events**

810 Given that the study is neither dictating the need for treatment of TB or specific regimen, serious  
811 adverse events will not be directly attributable to the study. The study will not dictate diagnosis or  
812 treatment algorithms for TB, and all diagnoses testing assays and treatment regimens will follow the  
813 Ethiopian national guidelines; thus, it will not introduce or prescribe new drugs. The major risks of this  
814 screening program are related only to pill-taking mechanisms. Both adverse events and serious  
815 adverse events will be reported to the EFDA in line with the stipulated timeline irrespective of  
816 relatedness to the study procedure. Adverse reactions to TB medications will not be considered the  
817 outcomes of the study. The investigators will capture these events only to the extent they are  
818 available in the study health facilities' records and registries. The investigators will conduct chart  
819 abstractions to review adverse events that are related to TB treatment, as recorded from the TB clinic  
820 registries. For patients who are co-infected with HIV, the chart review will also include the type of HIV  
821 regimens, viral load, CD4 counts, and other co-infections diagnosed and treated.

822 Regarding TB diagnosis, at the initial stage or following the intensive phase, there could be  
823 discrepancies between the health facility results (Smear microscopy or Xpert MTB/RIF) and the study  
824 result (MGIT liquid culture). In this case, the investigators will communicate the results to the  
825 healthcare providers for their review and decision.

## 826 **11.3. Interim monitoring and analysis**

827 The investigators will conduct interim monitoring and submit an analysis report to the independent  
828 Data and Safety Monitoring Board (DSMB). Then, the report will be sent together with DSMB's  
829 recommendation to the IRBs. The DSMB will periodically review and evaluate the study's collected  
830 data to follow up participant safety, the accuracy of study procedures, and the study progress in order  
831 to provide recommendations on the continuation, modification, or termination of the study. The  
832 DSMB will consist of an expert in the clinical aspects of TB, an expert biostatistician, and an  
833 investigator with expertise in current clinical trials conduct and methodology. External monitors may  
834 conduct technical audits, before, during, and after completion of the trial. This will include reviewing  
835 the research protocol, operations manual, standard operating procedures, and training materials

836 before initiation of the trial. The site investigators will make study documents and pertinent records  
837 readily available for inspection by the local IRB and site monitors.

## 838 **12.ETHICAL CONSIDERATIONS**

### 839 **12.1. Statement of compliance**

840 The trial will be carried out in accordance with the International Conference on Harmonization Good  
841 Clinical Practice (ICH GCP) and the recently adopted (2018) good clinical trial guideline and  
842 requirements of the Ethiopian Food and Drug Administration (EFDA) (30). The investigators have  
843 completed Human Subjects Protection and ICH GCP Training. Clinical trial site staff who are  
844 responsible for the conduct, management, or oversight of the trial will complete Human Subjects  
845 Protection and ICH GCP training. The protocol, informed consent forms, recruitment materials, and all  
846 participant materials will be submitted to the Institutional Review Board (IRB) for review and approval.  
847 Approval of both the protocol and the consent form will be obtained before any participant is  
848 enrolled. Any amendment to the protocol will be reviewed and approval by the IRB before the  
849 changes are implemented to the study. In addition, all changes to the consent form will be IRB-  
850 approved; a determination will be made regarding whether a new consent needs to be obtained from  
851 participants who provided consent, using a previously approved consent form.

### 852 **12.2. Ethical review**

853 The study does not involve new investigational product and no exemption will be sought. The pillbox  
854 device has been in use for clinical purposes other than TB. There will be no change in the treatment of  
855 TB from the national guidelines, neither the type of regimen nor the dose, but only the management  
856 of treatment.

857 The proposal and any subsequent modifications will be reviewed and approved by:

- 858 i) Scientific and Ethics Review Committee of the Center for Innovative Drug Development  
859 and Therapeutic Trials for Africa, College of Health Sciences, Addis Ababa University;
- 860 ii) Institutional Review Board of the College of Health Sciences, Addis Ababa University;
- 861 iii) Ethiopian Food and Drug Administration Authority (EFDA);
- 862 iv) Ethiopian National Research Ethics Review Committee (NRERC); and
- 863 v) The Institutional Review Board of Addis Ababa City Administration Health Bureau

864 All study sites will have their permission and written concurrence for data collection

### 865 **12.3. Informed consent**

866 Study participants, both patients and providers, will be given an information sheet, which includes the  
867 purpose of the study, the procedures to be followed, privacy and confidentiality and the risks and  
868 benefits of participation. The information sheet will be read to those who cannot read or write in the  
869 presence of a witness. All questions about the study will be answered to the satisfaction of the  
870 participant. If they agree to be part of the study, they will sign the informed consent. If the participant  
871 is illiterate, they will thumbprint the consent form, including the signature of the witness. A copy of  
872 the information sheet and the signed consent form will be given to each participant. The interview  
873 questionnaire will be conducted and filled in private. Neither the investigators nor the study provider  
874 data collectors will coerce or unduly influence the potential patient to participate or to continue to  
875 participate in the study. Participants will have the right to withdraw without any reason for  
876 termination or cross-over, and that care will not be affected in any way by declining or participating in  
877 the study.

### 878 **12.4. Confidentiality**

879 All filled questionnaires, evaluation forms, reports, and other records that leave the study sites will be  
880 identified by coded numbers only to maintain subject confidentiality. All records will be kept locked at  
881 the principal investigator's study office in Addis Ababa University, CDT-Africa. All computer entry and  
882 networking programs will be locked with a password. Participant's information will not be released  
883 without written permission of the subject, except as necessary for monitoring by the study team. Only  
884 the investigators will have access to the crude data.

### 885 **12.5. Payment for participation**

886 There will be no payment for participation, either in cash or in-kind, to patients in the intervention or  
887 DOT arm, or healthcare providers, as this would influence outcomes of the study. However, if the  
888 participants are coming just for the purpose of the study, they will be reimbursed for transport.

889

890

891

892

### 893 **13. REFERENCES**

- 894 1. Jiang WX, Long Q, Lucas H, Dong D, Chen JY, Xiang L, et al. Impact of an innovative financing  
895 and payment model on tuberculosis patients' financial burden: is tuberculosis care more  
896 affordable for the poor? *Infect Dis Poverty*. 2019;8(1):21.
- 897 2. Ukwaja KN. Social protection interventions could improve tuberculosis treatment outcomes.  
898 *Lancet Glob Health*. 2019;7(2):e167-e168.
- 899 3. Richterman A, Steer-Massaro J, Jarolimova J, Luong Nguyen LB, Werdenberg J, Ivers LC. Cash  
900 interventions to improve clinical outcomes for pulmonary tuberculosis: systematic review and  
901 meta-analysis. *Bull World Health Organ*. 2018;96(7):471-483.
- 902 4. Shete PB, Reid M, Goosby E. Message to world leaders: we cannot end tuberculosis without  
903 addressing the social and economic burden of the disease. *The Lancet Global Health*.  
904 2018;6(12):e1272-e3.
- 905 5. Dara M, Zachariah R. Hunger and tuberculosis: Two sides of the same coin. *International*  
906 *Journal of Tuberculosis and Lung Disease*. 2018;22(6):592.
- 907 6. Sakamoto H, Lee S, Ishizuka A, Hinoshita E, Hori H, Ishibashi N, et al. Challenges and  
908 opportunities for eliminating tuberculosis - leveraging political momentum of the UN high-  
909 level meeting on tuberculosis. *BMC Public Health*. 2019;19(1):76.
- 910 7. Ki-Moon B. Building a tuberculosis-free world on a foundation of universal health coverage.  
911 *Lancet*. 2019;393(10178):1268-1270.
- 912 8. Agins BD, Ikeda DJ, Reid MJA, Goosby E, Pai M, Cattamanchi A. Improving the cascade of  
913 global tuberculosis care: moving from the "what" to the "how" of quality improvement. *Lancet*  
914 *Infect Dis*. 2019 Aug 22. approved: S1473-3099(19)30420-7[Epub ahead of print].
- 915 9. Reid MJA, Arinaminpathy N, Bloom A, Bloom BR, Boehme C, Chaisson R, et al. Building a  
916 tuberculosis-free world: The Lancet Commission on tuberculosis. *Lancet*.  
917 2019;393(10178):1331-1384.
- 918 10. Cohen KA, Manson AL, Abeel T, Desjardins CA, Chapman SB, Hoffner S, et al. Extensive global  
919 movement of multidrug-resistantM. tuberculosis strains revealed by whole-genome analysis.  
920 *Thorax*. 2019;74(9):882-889.

- 921 11. Chihota et al, 2018. Geospatial distribution of Mycobacterium tuberculosis genotypes in  
922 Africa. PLoS One. 13(8):e0200632.
- 923 12. Knight GM, McQuaid CF, Dodd PJ, Houben RMGJ. Global burden of latent multidrug-resistant  
924 tuberculosis: trends and estimates based on mathematical modelling. Lancet Infect Dis.  
925 2019;19(8):903-912.
- 926 13. Walker TM, Merker M, Knoblauch AM, Helbling P, Schoch OD, van der Werf MJ, et al. A cluster  
927 of multidrug-resistant Mycobacterium tuberculosis among patients arriving in Europe from  
928 the Horn of Africa: a molecular epidemiological study. Lancet Infect Dis. 2018;18(4):431-40.
- 929 14. Wild V1, Jaff D2, Shah NS3, Frick M. Tuberculosis, human rights and ethics considerations  
930 along the route of a highly vulnerable migrant from sub-Saharan Africa to Europe. Int J Tuberc  
931 Lung Dis. 2017;21(10):1075-85
- 932 15. Armstrong LR, Winston CA, Stewart B, Tsang CA, Langer AJ, Navin TR. Changes in tuberculosis  
933 epidemiology, United States, 1993-2017. Int J Tuberc Lung Dis. 2019;23(7):797-804.
- 934 16. Eshetie S, Gizachew M, Alebel A, van Soolingen D. Tuberculosis treatment outcomes in  
935 Ethiopia from 2003 to 2016, and impact of HIV co-infection and prior drug exposure: A  
936 systematic review and meta-analysis. PLoS One. 2018;13(3):e0194675.
- 937 17. Matteelli A, Rendon A, Tiberi S, Al-Abri S, Voniatis C, Carvalho ACC, et al. Tuberculosis  
938 elimination: where are we now? Eur Respir Rev. 2018;27(148).
- 939 18. Collins D, Hafidz F, Mustikawati D. The economic burden of tuberculosis in Indonesia. Int J  
940 Tuberc Lung Dis 2017; 21;1041-8.
- 941 19. Tanimura T, Jaramillo E, Weil D, Raviglione M, Lonnroth K. Financial burden for tuberculosis  
942 patients in low- and middle income countries: a systematic review. Eur Respir J 2014;43:1763-  
943 75.
- 944 20. van den Hof S, Collins D, Hafidz F, Beyene D, Tursynbayeva A, Tiemersma E. The  
945 socioeconomic impact of multidrug resistant tuberculosis on patients: results from Ethiopia,  
946 Indonesia and Kazakhstan. BMC Infect Dis 2016;16:470.
- 947 21. Harries AD, Schwoebel V, Monedero-Recuero I, Aung TK, Chadha S, Chiang CY, et al.  
948 Challenges and opportunities to prevent tuberculosis in people living with HIV in low-income  
949 countries. Int J Tuberc Lung Dis. 2019;23(2):241-51.
- 950 22. Diallo A, Dahourou DL, Dah TTE, Tassemedo S, Sawadogo R, Meda N. Factors associated with  
951 tuberculosis treatment failure in the Central East Health region of Burkina Faso. Pan Afr Med J.  
952 2018;30:293.

- 953 23. Ruru Y, Matasik M, Oktavian A, Senyorita R, Mirino Y, Tarigan LH, et al. Factors associated with  
954 non-adherence during tuberculosis treatment among patients treated with DOTS strategy in  
955 Jayapura, Papua Province, Indonesia. *Glob Health Action*. 2018;11(1):1510592.
- 956 24. Gebreweld FH, Kifle MM, Gebremicheal FE, Simel LL, Gezae MM, Ghebreyesus SS, et al.  
957 Factors influencing adherence to tuberculosis treatment in Asmara, Eritrea: a qualitative  
958 study. *J Health Popul Nutr*. 2018;37(1):1.
- 959 25. Kibuule D, Verbeeck RK, Nunurai , Mavhunga F, Ene E, et al. Predictors of tuberculosis  
960 treatment success under the DOTS program in Namibia. *Expert Rev Respir Med*.  
961 2018;12(11):979-87.
- 962 26. Sharma SK, Jha S. Directly observed treatment is not the only solution for poor adherence and  
963 low cure of tuberculosis. *Evid Based Med*. 2015;20(5):180.
- 964 27. World Health Organization (WHO). Adherence to long-term therapies: evidence for action.  
965 WHO; Geneva, Switzerland, 2003
- 966 28. Pérez-Jover V, Sala-González M, Guilabert M, Mira JJ. Mobile Apps for Increasing Treatment  
967 Adherence: Systematic Review. *J Med Internet Res*. 2019;21(6):e12505.
- 968 29. World Health Organization (WHO). WHO TB report 2018. WHO: Geneva, Switzerland; 2018.
- 969 30. Collins D, Beyene D, Tedla Y, Mesfin H, Diro E. Can patients afford the cost of treatment for  
970 multidrug-resistant tuberculosis in Ethiopia? *Int J Tuberc Lung Dis*. 2018;22(8):905-11.
- 971 31. Asres A, Jerene D, Deressa W. Pre- and post-diagnosis costs of tuberculosis to patients on  
972 Directly Observed Treatment Short course in districts of southwestern Ethiopia: a longitudinal  
973 study. *J Health Popul Nutr*. 2018 May;37(1):15.
- 974 32. Woimo TT, Yimer WK, Bati T, Gesesew HA. The prevalence and factors associated for anti-  
975 tuberculosis treatment non-adherence among pulmonary tuberculosis patients in public  
976 health care facilities in South Ethiopia: a cross-sectional study. *BMC Public Health*.  
977 2017;17(1):269.
- 978 33. Getahun B, Wubie M, Dejenu G, Manyazewal T. Tuberculosis care strategies and their  
979 economic consequences for patients: the missing link to end tuberculosis. *Infect Dis Poverty*.  
980 2016;5(1):93.
- 981 34. Mesfin EA, Beyene D, Tesfaye A, Admasu A, Addise D, Amare M, et al. Drug-resistance  
982 patterns of *Mycobacterium tuberculosis* strains and associated risk factors among multi drug-  
983 resistant tuberculosis suspected patients from Ethiopia. *PLoS One*. 2018;13(6):e0197737.



- 984 35. Fiseha D, Demissie M. Assessment of Directly Observed Therapy (DOT) following tuberculosis  
985 regimen change in Addis Ababa, Ethiopia: a qualitative study. *BMC Infect Dis.* 2015;15:405.
- 986 36. Genet C, Melese A, Worede A. Effectiveness of directly observed treatment short course  
987 (DOTS) on treatment of tuberculosis patients in public health facilities of Debre Tabor Town,  
988 Ethiopia: retrospective study. *BMC Res Notes.* 2019;12(1):396.
- 989 37. Getahun B, Nkosi ZZ. Is directly observed tuberculosis treatment strategy patient-centered? A  
990 mixed method study in Addis Ababa, Ethiopia. *PLoS One.* 2017;12(8):e0181205.
- 991 38. Sagbakken M, Frich JC, Bjune GA, Porter JD. Ethical aspects of directly observed treatment for  
992 tuberculosis: a cross-cultural comparison. *BMC Med Ethics.* 2013;14:25.
- 993 39. Getahun B, Nkosi ZZ. Satisfaction of patients with directly observed treatment strategy in  
994 Addis Ababa, Ethiopia: A mixed-methods study. *PLoS One.* 2017;12(2):e0171209.
- 995 40. Adenager GS, Alemseged F, Asefa H, Gebremedhin AT. Factors Associated with Treatment  
996 Delay among Pulmonary Tuberculosis Patients in Public and Private Health Facilities in Addis  
997 Ababa, Ethiopia. *Tuberc Res Treat.* 2017;2017:5120841.
- 998 41. Tadesse S. Stigma against Tuberculosis Patients in Addis Ababa, Ethiopia. *PLoS One.*  
999 2016;11(4):e0152900.
- 1000 42. Woimo TT, Yimer WK, Bati T, Gesesew HA. The prevalence and factors associated for anti-  
1001 tuberculosis treatment non-adherence among pulmonary tuberculosis patients in public  
1002 health care facilities in South Ethiopia: a cross-sectional study. *BMC Public Health.*  
1003 2017;17(1):269.
- 1004 43. Tola HH, Holakouie-Naieni K, Tesfaye E, Mansournia MA, Yaseri M. Prevalence of tuberculosis  
1005 treatment non-adherence in Ethiopia: a systematic review and meta-analysis. *Int J Tuberc  
1006 Lung Dis.* 2019;23(6):741-749.
- 1007 44. Tesfay K, Tesfay S, Nigus E, Gebreyesus A, Gebreegziabiher D, Adane K. More than half of  
1008 presumptive multidrug-resistant cases referred to a tuberculosis referral laboratory in the  
1009 Tigray region of Ethiopia are multidrug resistant. *Int J Mycobacteriol.* 2016;5(3):324-327.
- 1010 45. Tafess K, Beyen TK, Abera A, Tasew G, Mekit S, Sisay S, et al. Treatment Outcomes of  
1011 Tuberculosis at Asella Teaching Hospital, Ethiopia: Ten Years' Retrospective Aggregated Data.  
1012 *Front Med (Lausanne).* 2018;5:38.
- 1013 46. Ethiopian Federal Ministry of Health (FMOH). National comprehensive tuberculosis, leprosy  
1014 and TB/HIV training manual for health care workers. FMOH; Addis Ababa, Ethiopia, 2016.

- 1015 47. Eshetie S, Gizachew M, Dagne M, Kumera G, Woldie H, Ambaw F, et al. Multidrug resistant  
1016 tuberculosis in Ethiopian settings and its association with previous history of anti-tuberculosis  
1017 treatment: a systematic review and meta-analysis. *BMC Infectious Diseases*. 2017;17(1):219.
- 1018 48. Ayalew A, Gashu Z, Anteneh T, Hiruy N, Habte D, Jerene D, et al. Improvement in tuberculosis  
1019 infection control practice via technical support in two regions of Ethiopia. *BMC Infectious  
1020 Diseases*. 2018;18(1):557.
- 1021 49. World Health Organization. WHO End TB Strategy. WHO; Geneva, Switzerland, 2015.
- 1022 50. Mhimbira F, Hella J, Maroa T, Kisandu S, Chiryamkubi M, Said K, et al. Home-Based and  
1023 Facility-Based Directly Observed Therapy of Tuberculosis Treatment under Programmatic  
1024 Conditions in Urban Tanzania. *PLoS One*. 2016;11(8):e0161171.
- 1025 51. Mkopi A, Range N, Lwilla F, Egwaga S, Schulze A, Geubbels E, et al. Adherence to tuberculosis  
1026 therapy among patients receiving home-based directly observed treatment: evidence from  
1027 the United Republic of Tanzania. *PLoS One*. 2012;7(12):e51828.
- 1028 52. Egwaga S, Mkopi A, Range N, Haag-Arbenz V, Baraka A, Grewal P. Patient-centred tuberculosis  
1029 treatment delivery under programmatic conditions in Tanzania: a cohort study. *BMC Med*.  
1030 2009;7:80.
- 1031 53. Oyieng'o D, Park P, Gardner A, Kisang G, Diero L, Sitienei J, et al. Community-based treatment  
1032 of multidrug-resistant tuberculosis: early experience and results from Western Kenya. *Public  
1033 Health Action*. 2012;2(2):38-42.
- 1034 54. Nackers F, Huerga H, Espié E, Aloo AO, Bastard M, Etard JF, et al. Adherence to self-  
1035 administered tuberculosis treatment in a high HIV-prevalence setting: a cross-sectional survey  
1036 in Homa Bay, Kenya. *PLoS One*. 2012;7(3):e32140.
- 1037 55. Cremers AL, Gerrets R, Kapata N, Kabika A, Birnie E, Klipstein-Grobusch K, et al. Tuberculosis  
1038 patients' pre-hospital delay and non-compliance with a longstanding DOT programme: a  
1039 mixed methods study in urban Zambia. *BMC Public Health*. 2016;16(1):1130.
- 1040 56. Serapelwane MG, Davhana-Maselesele M, Masilo GM. Experiences of patients having  
1041 tuberculosis (TB) regarding the use of Directly Observed Treatment Short-Course (DOTS) in the  
1042 North West Province, South Africa. *Curationis*. 2016;39(1):e1-e9.
- 1043 57. Kaplan R, Caldwell J, Hermans S, Adriaanse S, Mtwisha L, Bekker LG, et al. An integrated  
1044 community TB-HIV adherence model provides an alternative to DOT for tuberculosis patients  
1045 in Cape Town. *Int J Tuberc Lung Dis*. 2016;20(9):1185-91.

- 1046 58. Gebreweld FH, Kifle MM, Gebremicheal FE, Simel LL, Gezae MM, Ghebreyesus SS, et al.  
1047 Factors influencing adherence to tuberculosis treatment in Asmara, Eritrea: a qualitative  
1048 study. *J Health Popul Nutr.* 2018;37(1):1.
- 1049 59. Ismail N, Ismail F, Omar SV, Blows L, Gardee Y, Koornhof H, et al. Drug resistant tuberculosis in  
1050 Africa: Current status, gaps and opportunities. *Afr J Lab Med.* 2018 Dec 6;7(2):781.
- 1051 60. World Health Organization. Treatment of tuberculosis: Guidelines for treatment of drug-  
1052 susceptible tuberculosis and patient care, 2017 update. WHO, Geneva, Switzerland, 2017.
- 1053 61. Alipanah N, Jarlsberg L, Miller C, Linh NN, Falzon D, Jaramillo E, et al. Adherence interventions  
1054 and outcomes of tuberculosis treatment: A systematic review and meta-analysis of trials and  
1055 observational studies. *PLoS Med.* 2018;15(7):e1002595.
- 1056 62. DiStefano MJ, Schmidt H. mHealth for Tuberculosis Treatment Adherence: A Framework to  
1057 Guide Ethical Planning, Implementation, and Evaluation. *Glob Health Sci Pract.* 2016;4(2):211-  
1058 21.
- 1059 63. Elangovan R, Arulchelvan S. A Study on the Role of Mobile Phone Communication in  
1060 Tuberculosis DOTS Treatment. *Indian J Community Med.* 2013;38(4):229-33.
- 1061 64. Lei X, Liu Q, Wang H, Tang X, Li L, Wang Y. Is the short messaging service feasible to improve  
1062 adherence to tuberculosis care? A cross-sectional study. *Trans R Soc Trop Med Hyg.* 2013  
1063 Oct;107(10):666-8.
- 1064 65. Nsengiyumva NP, Mappin-Kasirer B, Oxlade O, Bastos M, Trajman A, Falzon D, et al. Evaluating  
1065 the potential costs and impact of digital health technologies for tuberculosis treatment  
1066 support. *Eur Respir J.* 2018;52(5).
- 1067 66. Subbaraman R, de Mondesert L, Musiimenta A, Pai M, Mayer KH, Thomas BE, et al. Digital  
1068 adherence technologies for the management of tuberculosis therapy: mapping the landscape  
1069 and research priorities. *BMJ Glob Health.* 2018;3(5):e001018.
- 1070 67. Ngwatu BK, Nsengiyumva NP, Oxlade O, Mappin-Kasirer B, Nguyen NL, Jaramillo E, et al. The  
1071 impact of digital health technologies on tuberculosis treatment: a systematic review. *Eur*  
1072 *Respir J.* 2018; 51(1): 1701596.
- 1073 68. Denkinger CM, Grenier J, Stratis AK, Akkihal A, Pant-Pai N, Pai M. Mobile health to improve  
1074 tuberculosis care and control: a call worth making. *Int J Tuberc Lung Dis.* 2013;17(6):719-27.
- 1075 69. Nglazi MD, Bekker LG, Wood R, Hussey GD, Wiysonge CS. Mobile phone text messaging for  
1076 promoting adherence to anti-tuberculosis treatment: a systematic review. *BMC Infect Dis.*  
1077 2013;13:566.

- 1078 70. World Health Organization (WHO). Handbook for the use of digital technologies to support  
1079 tuberculosis medication adherence. Geneva, Switzerland: World Health Organization; 2017.
- 1080 71. Bediang G, Stoll B, Elia N, Abena JL, Geissbuhler A. SMS reminders to improve adherence and  
1081 cure of tuberculosis patients in Cameroon (TB-SMS Cameroon): a randomized controlled trial.  
1082 BMC Public Health. 2018;18(1):583.
- 1083 72. Fang XH, Guan SY, Tang L, Tao FB, Zou Z, Wang JX, et al. Effect of Short Message Service on  
1084 Management of Pulmonary Tuberculosis Patients in Anhui Province, China: A Prospective,  
1085 Randomized, Controlled Study. Med Sci Monit. 2017;23:2465-9.
- 1086 73. Mohammed S, Glennerster R, Khan AJ. Impact of a daily SMS medication reminder system on  
1087 tuberculosis treatment outcomes: a randomized controlled trial. PLoS One.  
1088 2016;11(11):e0162944.
- 1089 74. Liu X, Lewis JJ, Zhang H, Lu W, Zhang S, Zheng G et al. Effectiveness of electronic reminders to  
1090 improve medication adherence in tuberculosis patients: a cluster-randomised trial. PLoS Med.  
1091 2015;12(9):e1001876.
- 1092 75. Iribarren S, Beck S, Pearce PF, Chirico C, Etchevarria M, Cardinale D, et al. TextTB: A Mixed  
1093 Method Pilot Study Evaluating Acceptance, Feasibility, and Exploring Initial Efficacy of a Text  
1094 Messaging Intervention to Support TB Treatment Adherence. Tuberc Res Treat.  
1095 2013;2013:349394.
- 1096 76. Onwubiko U, Wall K, Sales RM, Holland DP. Using Directly Observed Therapy (DOT) for latent  
1097 tuberculosis treatment - A hit or a miss? A propensity score analysis of treatment completion  
1098 among 274 homeless adults in Fulton County, GA. PLoS One. 2019;14(6):e0218373.
- 1099 77. Park S, Sentissi I, Gil SJ, Park WS, Oh B, Son AR, et al. Medication Event Monitoring System for  
1100 Infectious Tuberculosis Treatment in Morocco: A Retrospective Cohort Study. Int J Environ Res  
1101 Public Health. 2019;16(3).
- 1102 78. Liu X, Blaschke T, Thomas B, De Geest S, Jiang S, Gao Y, et al. Usability of a Medication Event  
1103 Reminder Monitor System (MERM) by Providers and Patients to Improve Adherence in the  
1104 Management of Tuberculosis. Int J Environ Res Public Health. 2017;14(10).
- 1105 79. Broomhead S, Mars M. Retrospective return on investment analysis of an electronic treatment  
1106 adherence device piloted in the Northern Cape Province. Telemed J E Health. 2012;18(1):24-  
1107 31.

1108 80. Thakkar D, Piparva KG, Lakkad SG. A pilot project: 99DOTS information communication  
1109 technology-based approach for tuberculosis treatment in Rajkot district. *Lung India*.  
1110 2019;36(2):108-111.

1111 81. Lam CK, McGinnis Pilote K, Haque A, Burzynski J, Chuck C, Macaraig M. Using Video  
1112 Technology to Increase Treatment Completion for Patients With Latent Tuberculosis Infection  
1113 on 3-Month Isoniazid and Rifapentine: An Implementation Study. *J Med Internet Res*.  
1114 2018;20(11):e287.

1115 82. Garfein RS, Liu L, Cuevas-Mota J, Collins K, Muñoz F, Catanzaro DG, et al. Tuberculosis  
1116 Treatment Monitoring by Video Directly Observed Therapy in 5 Health Districts, California,  
1117 USA. *Emerg Infect Dis*. 2018;24(10):1806-1815.

1118 83. Nguyen TA, Pham MT, Nguyen TL, Nguyen VN, Pham DC, Nguyen BH, et al. Video Directly  
1119 Observed Therapy to support adherence with treatment for tuberculosis in Vietnam: A  
1120 prospective cohort study. *Int J Infect Dis*. 2017;65:85-89.

1121 84. Chuck C, Robinson E, Macaraig M, Alexander M, Burzynski J. Enhancing management of  
1122 tuberculosis treatment with video directly observed therapy in New York City. *Int J Tuberc  
1123 Lung Dis*. 2016;20(5):588-93.

1124 85. Garfein RS, Collins K, Muñoz F, Moser K, Cerecer-Callu P, Raab F, et al. Feasibility of  
1125 tuberculosis treatment monitoring by video directly observed therapy: a binational pilot study.  
1126 *Int J Tuberc Lung Dis*. 2015;19(9):1057-64.

1127 86. Schwartz JK. Pillbox use, satisfaction, and effectiveness among persons with chronic health  
1128 conditions. *Assist Technol* 2017;29(4):181-187.

1129 87. e Souza FR, da Silva Santana C. A descriptive study about the use of pillboxes by older adults.  
1130 *Health* 2013;05(12):103-109.

1131 88. Sanders MJ, van Oss T. Using daily routines to promote medication adherence in older adults.  
1132 *Am J Occup Ther* 2013;67(1):91-99.

1133 89. Hayes TL, Hunt JM, Adami A, Kaye JA. An electronic pillbox for continuous monitoring of  
1134 medication adherence. *Conf Proc IEEE Eng Med Biol Soc* 2006;1:6400-6403

1135 90. Zimmerman MA. Empowerment theory: psychological, organizational and community levels of  
1136 analysis. *Handbook of Community Psychology*. J. Rappaport and E. Seidman. Boston, MA,  
1137 Springer US: 43-63, 2000.

1138 91. World Health Organization. Monitoring and evaluating digital health interventions: practical  
1139 guide to conducting research and assessment. WHO; Geneva, Switzerland, 2016.

- 1140 92. Wisepill. Somerset West, South Africa. Available at: <https://www.wisepill.com/>
- 1141 93. Wisepill Technologies. evriMED500 medication monitoring and reminder system: introduction,  
1142 Version: 1.333. Wisepill; South Africa, 2019. Available at:  
1143 [https://static1.squarespace.com/static/56224d8fe4b092a567c227aa/t/5c8a542b4e17b635a5f](https://static1.squarespace.com/static/56224d8fe4b092a567c227aa/t/5c8a542b4e17b635a5f442bf/1552569435055/evriMED500+Product+Handbook+Ver+1.333+14-03-19.pdf)  
1144 [442bf/1552569435055/evriMED500+Product+Handbook+Ver+1.333+14-03-19.pdf](https://static1.squarespace.com/static/56224d8fe4b092a567c227aa/t/5c8a542b4e17b635a5f442bf/1552569435055/evriMED500+Product+Handbook+Ver+1.333+14-03-19.pdf)
- 1145 94. Ethiopian Federal Ministry of Health. Health and health related indicators. FMOH; Addis  
1146 Ababa, Ethiopia, 2016.
- 1147 95. Morisky DE, DiMatteo MR. Improving the measurement of self-reported medication  
1148 nonadherence: final response. J Clin Epidemiol. 2011;64:258–263
- 1149 96. Brooke J. The System Usability Scale. Hewlett-Packard, USA, 1986
- 1150 97. TB CAP. Tool to Estimate Patients Costs. Hague: TB CAP; 2008.  
1151 [http://www.stoptb.org/wg/dots\\_expansion/tbandpoverty/spotlight.asp](http://www.stoptb.org/wg/dots_expansion/tbandpoverty/spotlight.asp)
- 1152 98. EQ 5D. EQ-5D-5L User Guide: basic information on how to use the EQ-5D-5L instrument,  
1153 Version 2.1. EQ 5D; Rotterdam, The Netherlands, 2015.
- 1154 99. Quintiles Late Phase. Treatment Satisfaction Questionnaire for Medication (TSQM version  
1155 1.4). QLP 2011.
- 1156 100. World Health Organization. Adherence to long-term therapies: evidence for action. WHO;  
1157 Geneva, Switzerland, 2003.
- 1158 101. World Health Organization. WHO guidelines on tuberculosis infection prevention and control,  
1159 2019 update. WHO; Geneva, Switzerland, 2019.
- 1160 102. World Health Organization. Tuberculosis patient cost surveys: a handbook. WHO; Geneva,  
1161 Switzerland, 2017.
- 1162 103. World Health Organization. WHO consolidated guidelines on drug-resistant tuberculosis  
1163 treatment. WHO; Geneva, Switzerland, 2019.
- 1164 104. World Health Organization. Definitions and reporting framework for tuberculosis – 2013  
1165 revision (updated 2014). WHO; Geneva, Switzerland, 2013.
- 1166 105. Wright A. REDCap: A tool for the electronic capture of research data. J Electron Resour Med  
1167 Libr. 2016;13:197-201.

1169
