# Supplementary material for: Effect of Digital Medication Event Reminder and Monitor-Observed Therapy vs Standard Directly Observed Therapy on Health-Related Quality of Life and Catastrophic Costs in Patients With Tuberculosis: A Secondary Analysis of a Randomized Clinical Trial
Source: PubMed Central journal article supplement (PMC9478770; doi:10.1001/jamanetworkopen.2022.30509), 2022-09-15
Supplement: jamanetwopen-e2230509-s002.pdf [file jamanetwopen-e2230509-s002.pdf]

## Supplemental Online Content

Manyazewal T, Woldeamanuel Y, Fekadu A, Holland DP, Marconi VC. Effect of digital medication event reminder and monitor-observed therapy vs standard directly observed therapy on health-related quality-of-life and catastrophic costs in patients with tuberculosis. *JAMA Netw Open*. 2022;5(9):e2230509.  
doi:10.1001/jamanetworkopen.2022.30509

**eTable.** Demographic, behavioral, and clinical factors and risk of low health-related quality of life (n=108)

This supplemental material has been provided by the authors to give readers additional information about their work.

eTable. Demographic, behavioral, and clinical factors and risk of low health-related quality of life (n=108)

| Variables                               | Categories, n      | CRR (95%CI)        | p-value      | ARR (95%CI)       | p-value       |
|-----------------------------------------|--------------------|--------------------|--------------|-------------------|---------------|
| Arm                                     | Control (56)       | 1.49 (1.35, 1.65)  | <b>.000*</b> | 1.49 (1.35, 1.65) | <b>.000**</b> |
|                                         | Intervention (52)  | 1                  |              | 1                 |               |
| <b>Sociodemographic characteristics</b> |                    |                    |              |                   |               |
| Gender                                  | Female (37)        | 1.04 (0.92, 1.16)  | .559         |                   |               |
|                                         | Male (71)          | 1                  |              |                   |               |
| Age                                     |                    | 1.00 (0.99, 1.01)  | <b>.189*</b> | 1.00 (0.99, 1.00) | .850          |
| Marital status                          | Married (50)       | 0.96 (0.86, 1.07)  | .436         |                   |               |
|                                         | Unmarried (58)     | 1                  |              |                   |               |
| Occupation                              | No Job (35)        | 1.02 (0.91, 1.14)  | .783         |                   |               |
|                                         | Have Job (73)      | 1                  |              |                   |               |
| Education                               | Below Prep. (77)   | 0.97 (0.86, 1.09)  | .588         |                   |               |
|                                         | Prep. & above (31) | 1                  |              |                   |               |
| # of cohabitants                        | ≤3 (62)            | 0.99 (0.88, 1.10)  | .804         |                   |               |
|                                         | ≥4 (46)            | 1                  |              |                   |               |
| # bedrooms                              | 1 (67)             | 1.01 (0.89, 1.13)  | .936         |                   |               |
|                                         | ≥2 (41)            | 1                  |              |                   |               |
| Household head                          | No (47)            | 0.98 (0.87, 1.09)  | .679         |                   |               |
|                                         | Yes (61)           | 1                  |              |                   |               |
| Residency                               | Permanent (88)     | 1.11 (0.95, 1.30)  | <b>.180*</b> | 1.06 (0.95, 1.18) | .292          |
|                                         | Temporary (20)     | 1                  |              | 1                 |               |
| <b>Behavioral characteristics</b>       |                    |                    |              |                   |               |
| Smoking per day                         | Never (90)         | 0.91 (0.80, 1.03)  | <b>.122*</b> | 1.00 (0.86, 1.17) | .988          |
|                                         | Yes (18)           | 1                  |              | 1                 |               |
| Khat                                    | Never (87)         | 0.91 (0.81, 1.03)  | <b>.143*</b> | 1.13 (0.95, 1.34) | .251          |
|                                         | Yes (21)           | 1                  |              | 1                 |               |
| Alcohol                                 | Never (67)         | 0.981 (0.88, 1.09) | .738         |                   |               |
|                                         | Yes (41)           | 1                  |              |                   |               |
| <b>Disease conditions</b>               |                    |                    |              |                   |               |
| HIV                                     | Negative (93)      | 1.03 (0.87, 1.21)  | .742         |                   |               |
|                                         | Positive (15)      | 1                  |              |                   |               |
| TB treatment                            | New (98)           | 1.19 (0.95, 1.49)  | <b>.132*</b> | 1.13 (0.94, 1.36) | .197          |
|                                         | Relapse (10)       | 1                  |              | 1                 |               |

CRR, crude relative risk; ARR, adjusted relative risk; CI, confidence interval; n=108 as 1 missing for HIV; Prep: preparatory
