# Supplementary material for: Effect of Digital Medication Event Reminder and Monitor-Observed Therapy vs Standard Directly Observed Therapy on Health-Related Quality of Life and Catastrophic Costs in Patients With Tuberculosis: A Secondary Analysis of a Randomized Clinical Trial
Source: PubMed Central journal article supplement (PMC9478770; doi:10.1001/jamanetworkopen.2022.30509), 2022-09-15
Supplement: jamanetwopen-e2230509-s003.pdf [file jamanetwopen-e2230509-s003.pdf]

Manyazewal T, Woldeamanuel Y, Fekadu A, Holland DP, Marconi VC. Effect of digital medication event reminder and monitor-observed therapy vs standard directly observed therapy on health-related quality-of-life and catastrophic costs in patients with tuberculosis: a secondary analysis of a randomized clinical trial. *JAMA Netw Open*. 2022;5(9):e2230509. doi:10.1001/jamanetworkopen.2022.30509

## Data Sharing Statement

### Data

**Data available:** Yes

**Data types:** Other (please specify)

**Additional Information:** The raw data and informed consent form will be shared by the corresponding author ([tsegahunm@gmail.com](mailto:tsegahunm@gmail.com), [tsegahun.manyazewal@aau.edu.et](mailto:tsegahun.manyazewal@aau.edu.et)), upon reasonable request, subject to approval by the Institutional Review Board of the College of Health Sciences, Addis Ababa University, Ethiopia.

**How to access data:** The raw data and informed consent form will be shared by the corresponding author ([tsegahunm@gmail.com](mailto:tsegahunm@gmail.com), [tsegahun.manyazewal@aau.edu.et](mailto:tsegahun.manyazewal@aau.edu.et)), upon reasonable request, subject to approval by the Institutional Review Board of the College of Health Sciences, Addis Ababa University, Ethiopia.

**When available:** With publication

### Supporting Documents

**Document types:** None

### Additional Information

**Who can access the data:** Researchers whose proposed use of the data has been approved

**Types of analyses:** For TB-related research

**Mechanisms of data availability:** The raw data and informed consent form will be shared by the corresponding author ([tsegahunm@gmail.com](mailto:tsegahunm@gmail.com), [tsegahun.manyazewal@aau.edu.et](mailto:tsegahun.manyazewal@aau.edu.et)), upon reasonable request, subject to approval by the Institutional Review Board of the College of Health Sciences, Addis Ababa University, Ethiopia.
